# Supplementary material for: Bartonella, Rickettsia, Babesia, and Hepatozoon Species in Fleas (Siphonaptera) Infesting Small Mammals of Slovakia (Central Europe)
Source: MDPI journal article supplement (doi:10.3390/pathogens11080886), 2022-08-06
Supplement: s1 [file s1]

**Table S2.** List of flea species collected from individual rodent species in three habitat types in southwestern and central Slovakia

| Habitat type, site   | Rodent species               | Flea species                          |
|----------------------|------------------------------|---------------------------------------|
| Suburban, Bratislava |                              |                                       |
|                      | <i>Apodemus flavicollis</i>  | <i>Ctenophthalmus agyrtes</i>         |
|                      |                              | <i>Ctenophthalmus congener</i>        |
|                      |                              | <i>Ctenophthalmus solutus</i>         |
|                      |                              | <i>Ceratophylus sciurorum</i>         |
|                      |                              | <i>Hystrihopsylla talpae</i>          |
|                      | <i>Myodes glareolus</i>      | <i>Ctenophthalmus agyrtes</i>         |
|                      |                              | <i>Ctenophthalmus congener</i>        |
|                      |                              | <i>Ctenophthalmus solutus</i>         |
|                      |                              | <i>Ceratophylus sciurorum</i>         |
|                      |                              | <i>Peromyscopsylla fallax</i>         |
|                      |                              | <i>Megabothris turbidus</i>           |
|                      |                              | <i>Hystrihopsylla talpae</i>          |
|                      |                              |                                       |
| Natural, Fúgelka     |                              |                                       |
|                      | <i>Apodemus flavicollis</i>  | <i>Ctenophthalmus agyrtes</i>         |
|                      |                              | <i>Ctenophthalmus congener</i>        |
|                      |                              | <i>Ceratophylus sciurorum</i>         |
|                      |                              | <i>Palaeopsylla similis</i>           |
|                      | <i>Myodes glareolus</i>      | <i>Ctenophthalmus agyrtes</i>         |
|                      |                              | <i>Ctenophthalmus congener</i>        |
|                      |                              | <i>Ctenophthalmus bisoctodentatus</i> |
|                      |                              | <i>Megabothris turbidus</i>           |
|                      |                              | <i>Rhadinopsylla integella</i>        |
|                      |                              | <i>Peromyscopsylla fallax</i>         |
|                      | <i>Microtus arvalis</i>      | <i>Ctenophthalmus agyrtes</i>         |
|                      |                              | <i>Ctenophthalmus congener</i>        |
|                      | <i>Microtus subterraneus</i> | <i>Ctenophthalmus agyrtes</i>         |
|                      |                              |                                       |
| Rural, Prievidza     |                              |                                       |
|                      | <i>Apodemus flavicollis</i>  | <i>Ctenophthalmus agyrtes</i>         |
|                      |                              | <i>Ctenophthalmus solutus</i>         |
|                      |                              | <i>Ctenophthalmus assimilis</i>       |
|                      |                              | <i>Nosopsyllus fasciatus</i>          |
|                      |                              | <i>Megabothris turbidus</i>           |
|                      | <i>Myodes glareolus</i>      | <i>Ctenophthalmus agyrtes</i>         |
|                      |                              | <i>Ctenophthalmus solutus</i>         |
|                      |                              | <i>Ctenophthalmus assimilis</i>       |
