# Supplementary material for: Bartonella, Rickettsia, Babesia, and Hepatozoon Species in Fleas (Siphonaptera) Infesting Small Mammals of Slovakia (Central Europe)
Source: MDPI journal article supplement (doi:10.3390/pathogens11080886), 2022-08-06
Supplement: s1 [file s1]

**Table S1.** Numbers of captured rodents (N), numbers of infested rodents (NP), numbers of fleas (n), and prevalence (P%) and mean intensity (I) of rodents' infestation with fleas in three habitat types in southwestern and central Slovakia

| Habitat type, site  | Rodent species         | N   | NP  | n   | P (%) | I    |
|---------------------|------------------------|-----|-----|-----|-------|------|
| Suburban Bratislava |                        |     |     |     |       |      |
| 2012                | <i>A. flavicollis</i>  | 90  | 37  | 56  | 41.11 | 1.51 |
|                     | <i>A. sylvaticus</i>   | 1   | 0   | 0   | -     | -    |
|                     | <i>M. glareolus</i>    | 94  | 34  | 56  | 36.17 | 1.65 |
| 2013                | <i>A. flavicollis</i>  | 5   | 4   | 15  | 80.00 | 3.75 |
|                     | <i>M. glareolus</i>    | 1   | 0   | 0   | -     | -    |
| 2014                | <i>A. flavicollis</i>  | 85  | 61  | 195 | 71.76 | 3.20 |
|                     | <i>M. glareolus</i>    | 24  | 21  | 112 | 87.50 | 5.33 |
| Total               |                        | 300 | 157 | 434 | 52.33 | 2.76 |
| Natural Fúgelka     |                        |     |     |     |       |      |
| 2012                | <i>A. flavicollis</i>  | 117 | 48  | 88  | 41.02 | 1.83 |
|                     | <i>M. glareolus</i>    | 84  | 36  | 98  | 42.86 | 2.72 |
|                     | <i>M. arvalis</i>      | 19  | 5   | 16  | 26.37 | 3.2  |
|                     | <i>M. subterraneus</i> | 1   | 1   | 3   | 100   | 3    |
| 2013                | <i>A. flavicollis</i>  | 1   | 0   | 0   | -     | -    |
|                     | <i>M. glareolus</i>    | 1   | 0   | 0   | -     | -    |
| 2014                | <i>A. flavicollis</i>  | 58  | 20  | 31  | 34.48 | 1.55 |
|                     | <i>M. glareolus</i>    | 23  | 11  | 21  | 47.83 | 1.91 |
|                     | <i>M. minutus</i>      | 1   | 0   | 0   | -     | -    |
| Total               |                        | 305 | 121 | 257 | 39.67 | 2.12 |
| Rural Prievidza     |                        |     |     |     |       |      |
| 2012                | <i>A. flavicollis</i>  | 40  | 17  | 29  | 42.50 | 1.71 |
|                     | <i>M. glareolus</i>    | 12  | 3   | 4   | 25.00 | 1.33 |
| 2013                | <i>A. flavicollis</i>  | 5   | 3   | 10  | 60.00 | 3.33 |
| Total               |                        | 57  | 23  | 43  | 40.35 | 1.87 |
| TOTAL (all sites)   |                        | 662 | 301 | 734 | 45.47 | 2.44 |
