# Supplementary material for: Bartonella, Rickettsia, Babesia, and Hepatozoon Species in Fleas (Siphonaptera) Infesting Small Mammals of Slovakia (Central Europe)
Source: MDPI journal article supplement (doi:10.3390/pathogens11080886), 2022-08-06
Supplement: s1 [file s1]

**Table S3.** GenBank accession numbers of *Bartonella* spp. 16S–23S rRNA ITS, *Babesia microti* and *Hepatozoon* sp. 18S rRNA gene sequences identified in fleas collected from rodents

| Name of the isolate                          | Source                                                         | bp  | GenBank accession number |          |
|----------------------------------------------|----------------------------------------------------------------|-----|--------------------------|----------|
|                                              |                                                                |     | 16S–23S<br>rRNA ITS      | 18S rRNA |
| Uncultured <i>Bartonella</i> sp. clone FU184 | <i>Ctenophthalmus agyrtes</i> from <i>Myodes glareolus</i>     | 460 | MK239960                 |          |
| Uncultured <i>Bartonella</i> sp. clone BA37  | <i>Ctenophthalmus solutus</i> from <i>Apodemus flavicollis</i> | 497 | MK239961                 |          |
| <i>Hepatozoon</i> sp. SK1 isolate F73        | <i>Ctenophthalmus agyrtes</i> from <i>Myodes glareolus</i>     | 502 |                          | MH784529 |
| <i>Hepatozoon</i> sp. SK1 isolate F103       | <i>Ctenophthalmus agyrtes</i> from <i>Apodemus flavicollis</i> | 502 |                          | MH784530 |
| <i>Hepatozoon</i> sp. SK1 isolate F114       | <i>Ctenophthalmus agyrtes</i> from <i>Apodemus flavicollis</i> | 502 |                          | MH784531 |
| <i>Hepatozoon</i> sp. SK1 isolate F185       | <i>Ctenophthalmus agyrtes</i> from <i>Myodes glareolus</i>     | 502 |                          | MH784532 |
| <i>Babesia microti</i> isolate F85           | <i>Ctenophthalmus agyrtes</i> from <i>Myodes glareolus</i>     | 474 |                          | MH784533 |
| <i>Babesia microti</i> isolate F92           | <i>Ctenophthalmus congener</i> from <i>Myodes glareolus</i>    | 474 |                          | MH784534 |
| <i>Babesia microti</i> isolate F110          | <i>Palaeopsylla similis</i> from <i>Apodemus flavicollis</i>   | 474 |                          | MH784535 |
