# Supplementary material for: Bartonella, Rickettsia, Babesia, and Hepatozoon Species in Fleas (Siphonaptera) Infesting Small Mammals of Slovakia (Central Europe)
Source: Pathogens. 2022 Aug 6;11(8):886. doi: 10.3390/pathogens11080886 (PMC9413308; doi:10.3390/pathogens11080886)
Supplement: Supplementary file 1 [file pathogens-11-00886-s001.zip]

Archive with 8 entries (8 files):
- Figure. S1.pdf
- Figure. S2.pdf
- Figure. S3.pdf
- Supplementary file S1.xls
- Supplementary file S2.pdf
- Table S1.pdf
- Table S2.pdf
- Table S3.pdf
