# Supplementary material for: Bartonella, Rickettsia, Babesia, and Hepatozoon Species in Fleas (Siphonaptera) Infesting Small Mammals of Slovakia (Central Europe)
Source: Pathogens. 2022 Aug 6;11(8):886. doi: 10.3390/pathogens11080886 (PMC9413308; doi:10.3390/pathogens11080886)
Supplement: Supplementary file 1 [file pathogens-11-00886-s001.zip › Supplementary file S1.xls]

## Sheet: MatrixOutput
Bartonella_sp._N29-3_AJ269791		0.00358233	0.00834732	0.00704148	0.00488253	0.00704148	0.00487188	0.00728049	0.00345874	0.00509141	0.00358233	0.00834732	0.00729924	0.579132	0.0215618	0.00345874	0.00704148	0.015941	0.0101991	0.00702194	0.0188947	0.00487188	0.00487188	0.0139075	0.00358233	0.0250066	0.00509141	0.0124776	0.0181117	0.0120181	0.00606239	0.00740936	0.00610557	0.00493838	0.0102447	0.0140317	0.0123769	0.00345874	0.00678981	0.00487188	0.00598758	0.00487188	0.00487949	0.00798768	0.00709708	0.0117218	0.00345874	0.00584559	0.00592133
Bartonella_sp._N40_AJ269787	0.00365881		0.00910644	0.00809389	0.00603319	0.00809389	0.00604526	0.00819009	0.00490019	0.00629022	0	0.00910644	0.00814777	0.579132	0.0220503	0.00490019	0.00809389	0.0166023	0.010925	0.00793238	0.0197763	0.00604526	0.00604526	0.0139075	0	0.0250066	0.00629022	0.0124776	0.0189217	0.0126837	0.00727604	0.00611101	0.00706959	0.00605107	0.0111543	0.0148	0.0130522	0.00490019	0.00776816	0.00604526	0.00701314	0.00604526	0.00613735	0.00880672	0.00809091	0.0124179	0.00490019	0.00689884	0.00698495
Uncult._Bartonella_sp._F63_KU886431	0.0187516	0.0225598		0.010112	0.00637925	0.010112	0.00841037	0.0102057	0.00737477	0.00826524	0.00910644	0	0.010241	0.619278	0.0208178	0.00737477	0.010112	0.0186186	0.0128904	0.00647922	0.0230788	0.00841037	0.00841037	0.0175205	0.00910644	0.0289691	0.00826524	0.0167169	0.0155028	0.00749916	0.00918475	0.0120868	0.00851168	0.00832598	0.0141865	0.0164512	0.0144852	0.00737477	0.00829812	0.00841037	0.00753065	0.00841037	0.00836188	0.00774367	0.00845922	0.0127258	0.00737477	0.00726848	0.00904548
Uncult._Bartonella_sp._Z85_KU886453	0.0148861	0.0186551	0.0264069		0.00692024	0	0.00494566	0.00749216	0.00604665	0.00713195	0.00809389	0.010112	0.00710738	0.600382	0.0229043	0.00604665	0	0.0158228	0.00986572	0.00866505	0.0215392	0.00494566	0.00494566	0.017211	0.00809389	0.027162	0.00713195	0.0154506	0.0199361	0.0136254	0.00827287	0.0109617	0.00615809	0.00704455	0.0132431	0.0136786	0.0121307	0.00604665	0.006875	0.00494566	0.00595932	0.00494566	0.00508531	0.00784519	0.00892072	0.0114597	0.00604665	0.00771515	0.0061067
Uncult._Bartonella_sp._M150_KU886518	0.00736778	0.0110797	0.0111441	0.0148211		0.00692024	0.00481933	0.00729912	0.00334949	0.00502556	0.00603319	0.00637925	0.00709324	0.601158	0.0197793	0.00334949	0.00692024	0.0157824	0.00993987	0.0047344	0.0205476	0.00481933	0.00481933	0.0155917	0.00603319	0.0248815	0.00502556	0.0140465	0.0163596	0.0104687	0.00620615	0.00922125	0.00604758	0.00502078	0.0117094	0.0137599	0.0123632	0.00334949	0.00478251	0.00481933	0.00343742	0.00481933	0.00481754	0.00613219	0.00497902	0.0114797	0.00334949	0.00334355	0.00576319
Uncult._Bartonella_sp._DQ155374	0.0148861	0.0186551	0.0264069	0	0.0148211		0.00494566	0.00749216	0.00604665	0.00713195	0.00809389	0.010112	0.00710738	0.600382	0.0229043	0.00604665	0	0.0158228	0.00986572	0.00866505	0.0215392	0.00494566	0.00494566	0.017211	0.00809389	0.027162	0.00713195	0.0154506	0.0199361	0.0136254	0.00827287	0.0109617	0.00615809	0.00704455	0.0132431	0.0136786	0.0121307	0.00604665	0.006875	0.00494566	0.00595932	0.00494566	0.00508531	0.00784519	0.00892072	0.0114597	0.00604665	0.00771515	0.0061067
Uncult._Bartonella_sp._DQ155379	0.00736778	0.0110797	0.0186688	0.00737303	0.00733609	0.00737303		0.00523695	0.00343742	0.00506562	0.00604526	0.00841037	0.00495175	0.600988	0.0211893	0.00343742	0.00494566	0.0143127	0.00832616	0.00703967	0.0204888	0	0	0.0155775	0.00604526	0.0250007	0.00506562	0.0139264	0.018279	0.0120653	0.00635992	0.00930055	0.00351682	0.00498306	0.0118381	0.0139107	0.0123695	0.00343742	0.00461984	0	0.00334949	0	0.00480983	0.00607406	0.00706941	0.0100479	0.00343742	0.00576319	0.00334355
Uncult._Bartonella_sp._DQ155381	0.0149409	0.0187241	0.0265061	0.0149517	0.0148753	0.0149517	0.00739975		0.00638107	0.00758217	0.00819009	0.0102057	0.00742211	0.606607	0.023168	0.00638107	0.00749216	0.0162386	0.0102923	0.0089695	0.0225171	0.00523695	0.00523695	0.0172932	0.00819009	0.0272749	0.00758217	0.0156172	0.0201173	0.0139239	0.00844434	0.0111815	0.0062936	0.00732288	0.013519	0.0157243	0.0145492	0.00638107	0.00719715	0.00523695	0.00629908	0.00523695	0.00729326	0.00806713	0.00934881	0.0118673	0.00638107	0.00808479	0.00637141
Uncult._Bartonella_sp._DQ155384	0.00367453	0.00736778	0.0148969	0.0110877	0.00365881	0.0110877	0.00365881	0.0111281		0.00356349	0.00490019	0.00737477	0.0062727	0.579132	0.02059	0	0.00604665	0.0149892	0.00919156	0.00592879	0.0195727	0.00343742	0.00343742	0.014666	0.00490019	0.0238799	0.00356349	0.0131953	0.0174572	0.0112448	0.00509594	0.008343	0.00501205	0.00348838	0.0109923	0.0132167	0.0116507	0	0.00576319	0.00343742	0.00481933	0.00343742	0.00341298	0.00706312	0.00607827	0.0108388	0	0.00461984	0.00478251
Uncult._Bartonella_sp._DQ155387	0.00739975	0.0111281	0.0187516	0.0148861	0.00736778	0.0148861	0.00736778	0.0149409	0.00367453		0.00629022	0.00826524	0.00740156	0.579132	0.0213029	0.00356349	0.00713195	0.0157776	0.0102369	0.00709911	0.0205079	0.00506562	0.00506562	0.0156923	0.00629022	0.0250628	0	0.0142248	0.0182683	0.0119024	0.00641918	0.00931345	0.00630409	0.00513603	0.011868	0.0141333	0.0109034	0.00356349	0.00690719	0.00506562	0.00619984	0.00506562	0.00493313	0.00810157	0.00730174	0.0117796	0.00356349	0.0058848	0.00600193
Uncult._Bartonella_sp._wbs61_AJ269794	0.00365881	0	0.0225598	0.0186551	0.0110797	0.0186551	0.0110797	0.0187241	0.00736778	0.0111281		0.00910644	0.00814777	0.579132	0.0220503	0.00490019	0.00809389	0.0166023	0.010925	0.00793238	0.0197763	0.00604526	0.00604526	0.0139075	0	0.0250066	0.00629022	0.0124776	0.0189217	0.0126837	0.00727604	0.00611101	0.00706959	0.00605107	0.0111543	0.0148	0.0130522	0.00490019	0.00776816	0.00604526	0.00701314	0.00604526	0.00613735	0.00880672	0.00809091	0.0124179	0.00490019	0.00689884	0.00698495
B._taylorii_AJ269784	0.0187516	0.0225598	0	0.0264069	0.0111441	0.0264069	0.0186688	0.0265061	0.0148969	0.0187516	0.0225598		0.010241	0.619278	0.0208178	0.00737477	0.010112	0.0186186	0.0128904	0.00647922	0.0230788	0.00841037	0.00841037	0.0175205	0.00910644	0.0289691	0.00826524	0.0167169	0.0155028	0.00749916	0.00918475	0.0120868	0.00851168	0.00832598	0.0141865	0.0164512	0.0144852	0.00737477	0.00829812	0.00841037	0.00753065	0.00841037	0.00836188	0.00774367	0.00845922	0.0127258	0.00737477	0.00726848	0.00904548
B._taylorii_WM9_AJ269788	0.0149517	0.0187378	0.026526	0.0149626	0.0148861	0.0149626	0.00740504	0.015018	0.0111361	0.0149517	0.0187378	0.026526		0.613865	0.0233075	0.0062727	0.00710738	0.0160289	0.00992311	0.00886349	0.0225457	0.00495175	0.00495175	0.0174177	0.00814777	0.0262712	0.00740156	0.0147305	0.0202324	0.0136924	0.00849852	0.011128	0.00623562	0.00738206	0.0129467	0.0147445	0.0141135	0.0062727	0.00686731	0.00495175	0.00593474	0.00495175	0.00712227	0.00795499	0.00903249	0.0106793	0.0062727	0.00788695	0.00612524
B._henselae_Houston_L35101	1.30913	1.30913	1.35891	1.33704	1.3026	1.33704	1.3026	1.32541	1.30913	1.30913	1.30913	1.35891	1.32407		0.718813	0.579132	0.600382	0.616861	0.619233	0.601158	0.560397	0.600988	0.600988	0.589665	0.579132	0.708272	0.579132	0.570063	0.656124	0.621591	0.62128	0.596067	0.597673	0.588459	0.62687	0.656579	0.641605	0.579132	0.600249	0.600988	0.602174	0.600988	0.577988	0.602174	0.578324	0.630515	0.579132	0.578368	0.57819
BA31_MF039545	0.079535	0.0839598	0.0756569	0.0884871	0.0703946	0.0884871	0.0791239	0.0888756	0.0747477	0.079535	0.0839598	0.0756569	0.0889557	1.57462		0.02059	0.0229043	0.0408004	0.0252298	0.0200121	0.0417627	0.0211893	0.0211893	0.0359673	0.0220503	0.0533041	0.0213029	0.0306089	0.027974	0.0253571	0.0225551	0.0262792	0.0215227	0.0216472	0.0278693	0.0293304	0.0265137	0.02059	0.0212613	0.0211893	0.0203731	0.0211893	0.021478	0.0205733	0.0221512	0.0263352	0.02059	0.0206659	0.022035
BA36_MF039546	0.00367453	0.00736778	0.0148969	0.0110877	0.00365881	0.0110877	0.00365881	0.0111281	0	0.00367453	0.00736778	0.0148969	0.0111361	1.30913	0.0747477		0.00604665	0.0149892	0.00919156	0.00592879	0.0195727	0.00343742	0.00343742	0.014666	0.00490019	0.0238799	0.00356349	0.0131953	0.0174572	0.0112448	0.00509594	0.008343	0.00501205	0.00348838	0.0109923	0.0132167	0.0116507	0	0.00576319	0.00343742	0.00481933	0.00343742	0.00341298	0.00706312	0.00607827	0.0108388	0	0.00461984	0.00478251
BA48_MF039547	0.0148861	0.0186551	0.0264069	0	0.0148211	0	0.00737303	0.0149517	0.0110877	0.0148861	0.0186551	0.0264069	0.0149626	1.33704	0.0884871	0.0110877		0.0158228	0.00986572	0.00866505	0.0215392	0.00494566	0.00494566	0.017211	0.00809389	0.027162	0.00713195	0.0154506	0.0199361	0.0136254	0.00827287	0.0109617	0.00615809	0.00704455	0.0132431	0.0136786	0.0121307	0.00604665	0.006875	0.00494566	0.00595932	0.00494566	0.00508531	0.00784519	0.00892072	0.0114597	0.00604665	0.00771515	0.0061067
BA95_MF039548	0.0522185	0.0563912	0.0652361	0.0522612	0.0519649	0.0522612	0.0437286	0.0524746	0.0478358	0.0522185	0.0563912	0.0652361	0.0525178	1.31792	0.13839	0.0478358	0.0522612		0.0184871	0.0175026	0.0297153	0.0143127	0.0143127	0.0220067	0.0166023	0.0542938	0.0157776	0.0256445	0.0328384	0.0202981	0.0167086	0.0195487	0.0152903	0.0160064	0.0217725	0.0224005	0.0228191	0.0149892	0.0157761	0.0143127	0.0151108	0.0143127	0.0156882	0.0164576	0.017611	0.0204318	0.0149892	0.0164306	0.0150385
BA118_MF039549	0.0264863	0.030348	0.0383636	0.0265061	0.0263676	0.0265061	0.0187378	0.0266061	0.0225431	0.0264863	0.030348	0.0383636	0.0266261	1.36632	0.0979845	0.0225431	0.0265061	0.0655087		0.0117251	0.0244848	0.00832616	0.00832616	0.0199819	0.010925	0.0309296	0.0102369	0.0182057	0.0233237	0.0160594	0.011321	0.013665	0.009335	0.00930244	0.0159865	0.0169085	0.0166305	0.00919156	0.00989832	0.00832616	0.00912695	0.00832616	0.009807	0.0109154	0.0117329	0.0139414	0.00919156	0.0106535	0.00921918
BA191_MF039550	0.0148753	0.0186415	0.011193	0.0224431	0.00736778	0.0224431	0.0148104	0.0225265	0.0110797	0.0148753	0.0186415	0.011193	0.0225431	1.3026	0.0707559	0.0110797	0.0224431	0.060586	0.0342291		0.0215759	0.00703967	0.00703967	0.0164378	0.00793238	0.0267448	0.00709911	0.0146024	0.0180479	0.0105528	0.00786178	0.0109796	0.00712166	0.00697949	0.0131932	0.0150309	0.0137064	0.00592879	0.00686124	0.00703967	0.0060463	0.00703967	0.00690139	0.00644844	0.0070837	0.0116583	0.00592879	0.00574548	0.00768196
BA253_MF039551	0.0733018	0.0775839	0.092143	0.0871802	0.082306	0.0871802	0.082306	0.0919789	0.0779781	0.082729	0.0775839	0.092143	0.0920609	1.18402	0.157454	0.0779781	0.0871802	0.123822	0.100981	0.0871036		0.0204888	0.0204888	0.019531	0.0197763	0.0557719	0.0205079	0.0266991	0.0364879	0.0282527	0.0210149	0.0212081	0.0204553	0.0205594	0.0243635	0.0284577	0.0270503	0.0195727	0.0220112	0.0204888	0.0214609	0.0204888	0.0204323	0.0208673	0.0228545	0.0260701	0.0195727	0.0210933	0.0210816
FU17_MF039552	0.00736778	0.0110797	0.0186688	0.00737303	0.00733609	0.00737303	0	0.00739975	0.00365881	0.00736778	0.0110797	0.0186688	0.00740504	1.3026	0.0791239	0.00365881	0.00737303	0.0437286	0.0187378	0.0148104	0.082306		0	0.0155775	0.00604526	0.0250007	0.00506562	0.0139264	0.018279	0.0120653	0.00635992	0.00930055	0.00351682	0.00498306	0.0118381	0.0139107	0.0123695	0.00343742	0.00461984	0	0.00334949	0	0.00480983	0.00607406	0.00706941	0.0100479	0.00343742	0.00576319	0.00334355
FU24_MF039553	0.00736778	0.0110797	0.0186688	0.00737303	0.00733609	0.00737303	0	0.00739975	0.00365881	0.00736778	0.0110797	0.0186688	0.00740504	1.3026	0.0791239	0.00365881	0.00737303	0.0437286	0.0187378	0.0148104	0.082306	0		0.0155775	0.00604526	0.0250007	0.00506562	0.0139264	0.018279	0.0120653	0.00635992	0.00930055	0.00351682	0.00498306	0.0118381	0.0139107	0.0123695	0.00343742	0.00461984	0	0.00334949	0	0.00480983	0.00607406	0.00706941	0.0100479	0.00343742	0.00576319	0.00334355
FU26_MF039554	0.0394551	0.0394551	0.0567635	0.0564377	0.0478358	0.0564377	0.0478358	0.0566695	0.0437286	0.0480679	0.0394551	0.0567635	0.0567165	1.26573	0.128363	0.0437286	0.0564377	0.0799506	0.0697981	0.0522185	0.0776503	0.0478358	0.0478358		0.0139075	0.0364979	0.0156923	0.0192389	0.0312954	0.0219222	0.0165444	0.0146723	0.0146975	0.0154636	0.0154212	0.022313	0.021924	0.014666	0.0171138	0.0155775	0.0164837	0.0155775	0.0156103	0.0170672	0.0171694	0.0205559	0.014666	0.0162346	0.0162698
FU31_MF039555	0.00365881	0	0.0225598	0.0186551	0.0110797	0.0186551	0.0110797	0.0187241	0.00736778	0.0111281	0	0.0225598	0.0187378	1.30913	0.0839598	0.00736778	0.0186551	0.0563912	0.030348	0.0186415	0.0775839	0.0110797	0.0110797	0.0394551		0.0250066	0.00629022	0.0124776	0.0189217	0.0126837	0.00727604	0.00611101	0.00706959	0.00605107	0.0111543	0.0148	0.0130522	0.00490019	0.00776816	0.00604526	0.00701314	0.00604526	0.00613735	0.00880672	0.00809091	0.0124179	0.00490019	0.00689884	0.00698495
FU38_MF039556	0.0955865	0.0955865	0.110419	0.104998	0.0950668	0.104998	0.0950668	0.105483	0.0904769	0.0955865	0.0955865	0.110419	0.100136	1.59704	0.183453	0.0904769	0.104998	0.158857	0.120533	0.104899	0.19089	0.0950668	0.0950668	0.133885	0.0955865		0.0250628	0.0213647	0.047318	0.0363181	0.0265996	0.0291921	0.0263459	0.0253719	0.0305786	0.0374414	0.0339929	0.0238799	0.0252775	0.0250007	0.0260135	0.0250007	0.0252694	0.0278864	0.0272969	0.0265562	0.0238799	0.0241593	0.0242337
FU39_MF039557	0.00739975	0.0111281	0.0187516	0.0148861	0.00736778	0.0148861	0.00736778	0.0149409	0.00367453	0	0.0111281	0.0187516	0.0149517	1.30913	0.079535	0.00367453	0.0148861	0.0522185	0.0264863	0.0148753	0.082729	0.00736778	0.00736778	0.0480679	0.0111281	0.0955865		0.0142248	0.0182683	0.0119024	0.00641918	0.00931345	0.00630409	0.00513603	0.011868	0.0141333	0.0109034	0.00356349	0.00690719	0.00506562	0.00619984	0.00506562	0.00493313	0.00810157	0.00730174	0.0117796	0.00356349	0.0058848	0.00600193
FU49_MF039558	0.0352182	0.0352182	0.0564377	0.0519649	0.0434852	0.0519649	0.0434852	0.0521758	0.0394239	0.0436936	0.0352182	0.0564377	0.0477587	1.29262	0.120891	0.0394239	0.0519649	0.0956757	0.0651263	0.0475679	0.108283	0.0434852	0.0434852	0.0660084	0.0352182	0.0803709	0.0436936		0.0284969	0.0206938	0.0147614	0.0154961	0.0146871	0.013883	0.0170742	0.0209984	0.020586	0.0131953	0.0151674	0.0139264	0.0147647	0.0139264	0.0140252	0.016167	0.015879	0.0178363	0.0131953	0.0144598	0.0143884
FU64_MF039559	0.0655642	0.0698577	0.0519649	0.0742377	0.0567635	0.0742377	0.0652361	0.0745535	0.0609886	0.0655642	0.0698577	0.0519649	0.0746181	1.46426	0.11074	0.0609886	0.0742377	0.12159	0.0882501	0.0655642	0.145115	0.0652361	0.0652361	0.11673	0.0698577	0.164201	0.0655642	0.111152		0.0197688	0.0193768	0.0228718	0.0194904	0.0186934	0.024875	0.025419	0.0250625	0.0174572	0.0180474	0.018279	0.0171943	0.018279	0.0183044	0.0187931	0.0186666	0.0247956	0.0174572	0.0172327	0.0190741
FU81_MF039561	0.034837	0.0388107	0.015051	0.0428384	0.0268282	0.0428384	0.0346763	0.0430066	0.0307421	0.034837	0.0388107	0.015051	0.0430405	1.35246	0.0959445	0.0307421	0.0428384	0.0746828	0.0554834	0.0269512	0.112937	0.0346763	0.0346763	0.0755903	0.0388107	0.133225	0.034837	0.0751336	0.070334		0.012514	0.0154822	0.012219	0.012091	0.0179495	0.0199476	0.0178545	0.0112448	0.0120091	0.0120653	0.0113243	0.0120653	0.0120063	0.0112429	0.0121708	0.0161166	0.0112448	0.0111956	0.0126683
FU186_MF039564	0.011193	0.0149626	0.0226946	0.0187654	0.0111441	0.0187654	0.0111441	0.0188351	0.00741034	0.011193	0.0149626	0.0226946	0.018849	1.36531	0.0845522	0.00741034	0.0187654	0.0567635	0.0305322	0.0187516	0.0877117	0.0111441	0.0111441	0.0525611	0.0149626	0.100976	0.011193	0.0481069	0.070334	0.0390536		0.0101143	0.007398	0.00647654	0.0128461	0.014534	0.0120057	0.00509594	0.00805357	0.00635992	0.00730109	0.00635992	0.00626779	0.00905613	0.00815455	0.0127146	0.00509594	0.00708413	0.00728678
FU199_MF039565	0.0149517	0.0111849	0.0345965	0.0305091	0.0226441	0.0305091	0.0226441	0.0306253	0.0188213	0.0227459	0.0111849	0.0345965	0.0306486	1.35997	0.0990476	0.0188213	0.0305091	0.0701529	0.0426713	0.030486	0.0823774	0.0226441	0.0226441	0.0437637	0.0111849	0.111568	0.0227459	0.0480679	0.0842509	0.0516304	0.0267674		0.0103128	0.00932648	0.0138999	0.0174976	0.0153712	0.008343	0.0106713	0.00930055	0.0101218	0.00930055	0.00925112	0.0116589	0.00993914	0.0152053	0.008343	0.0098171	0.00995114
FU306_MF039567	0.0111361	0.0148861	0.0187654	0.0111441	0.0110877	0.0111441	0.00367713	0.0111849	0.00737303	0.0111361	0.0148861	0.0187654	0.011193	1.29759	0.0796051	0.00737303	0.0111441	0.0481069	0.0226609	0.0148861	0.0822347	0.00367713	0.00367713	0.0434852	0.0148861	0.100324	0.0111361	0.0478358	0.0699174	0.034864	0.0149736	0.0266261		0.0061533	0.0126465	0.0147757	0.0131117	0.00501205	0.00586888	0.00351682	0.00486038	0.00351682	0.00616453	0.00614888	0.0081102	0.0101745	0.00501205	0.00687874	0.0049264
FU290_MF039568	0.00740504	0.0111361	0.0187654	0.0148969	0.00737303	0.0148969	0.00737303	0.0149517	0.00367713	0.00740504	0.0111361	0.0187654	0.0149626	1.33704	0.0796051	0.00367713	0.0148969	0.0522612	0.0226609	0.0148861	0.0828012	0.00737303	0.00737303	0.0481069	0.0111361	0.0956757	0.00740504	0.0437286	0.0656198	0.034864	0.0112011	0.0227629	0.0111441		0.0118317	0.0140007	0.0126282	0.00348838	0.00698434	0.00498306	0.00617526	0.00498306	0.00486622	0.00809951	0.00731906	0.011508	0.00348838	0.00599752	0.00604293
PD121_MF039569	0.0266662	0.0305553	0.0470413	0.0427714	0.0346231	0.0427714	0.0346231	0.042939	0.0306953	0.0347833	0.0305553	0.0470413	0.0389622	1.35891	0.109802	0.0306953	0.0427714	0.079465	0.0553937	0.042738	0.101798	0.0346231	0.0346231	0.0476061	0.0305553	0.11673	0.0347833	0.0568107	0.0990476	0.064857	0.0389926	0.0429728	0.0387806	0.0348102		0.0176568	0.0179608	0.0109923	0.0130626	0.0118381	0.0125265	0.0118381	0.011607	0.0139402	0.0133822	0.0163318	0.0109923	0.0122734	0.0124467
PD122_MF039570	0.0435198	0.0476061	0.0562079	0.0430744	0.0433131	0.0430744	0.0433131	0.0519649	0.0392688	0.0435198	0.0476061	0.0562079	0.0475679	1.43983	0.115517	0.0392688	0.0430744	0.0850004	0.0603382	0.0517139	0.118386	0.0433131	0.0433131	0.0805144	0.0476061	0.134164	0.0435198	0.0755903	0.0998681	0.0748126	0.0437988	0.0609376	0.0476444	0.0435546	0.0609886		0.0179177	0.0132167	0.0150047	0.0139107	0.0144505	0.0139107	0.0138228	0.0157927	0.0153659	0.0176082	0.0132167	0.0143346	0.0145214
PD127_MF039572	0.039207	0.0432445	0.0517139	0.0388107	0.0390231	0.0388107	0.0390231	0.0475298	0.0350265	0.0309075	0.0432445	0.0517139	0.0475679	1.45859	0.105198	0.0350265	0.0388107	0.089991	0.0602386	0.0473031	0.119054	0.0390231	0.0390231	0.0854537	0.0432445	0.140075	0.0309075	0.0804426	0.105098	0.0699772	0.0350265	0.0563448	0.0432788	0.0392379	0.0698577	0.0660648		0.0116507	0.0136012	0.0123695	0.0130644	0.0123695	0.0122568	0.0143047	0.0125149	0.0180871	0.0116507	0.0129251	0.0129796
BA2	0.00367453	0.00736778	0.0148969	0.0110877	0.00365881	0.0110877	0.00365881	0.0111281	0	0.00367453	0.00736778	0.0148969	0.0111361	1.30913	0.0747477	0	0.0110877	0.0478358	0.0225431	0.0110797	0.0779781	0.00365881	0.00365881	0.0437286	0.00736778	0.0904769	0.00367453	0.0394239	0.0609886	0.0307421	0.00741034	0.0188213	0.00737303	0.00367713	0.0306953	0.0392688	0.0350265		0.00576319	0.00343742	0.00481933	0.00343742	0.00341298	0.00706312	0.00607827	0.0108388	0	0.00461984	0.00478251
BA3	0.0148104	0.0185597	0.0186688	0.0148211	0.00733609	0.0148211	0.00733609	0.0148753	0.0110318	0.0148104	0.0185597	0.0186688	0.0148861	1.3026	0.0791239	0.0110318	0.0148211	0.0519649	0.0263676	0.0148104	0.0910269	0.00733609	0.00733609	0.0561158	0.0185597	0.0950668	0.0148104	0.0516721	0.0652361	0.0346763	0.0186688	0.030348	0.0110877	0.0148211	0.0425388	0.0514655	0.0470787	0.0110318		0.00461984	0.00334355	0.00461984	0.00679559	0.00596198	0.00700961	0.0100808	0.00576319	0.00343742	0.00334949
BA6	0.00736778	0.0110797	0.0186688	0.00737303	0.00733609	0.00737303	0	0.00739975	0.00365881	0.00736778	0.0110797	0.0186688	0.00740504	1.3026	0.0791239	0.00365881	0.00737303	0.0437286	0.0187378	0.0148104	0.082306	0	0	0.0478358	0.0110797	0.0950668	0.00736778	0.0434852	0.0652361	0.0346763	0.0111441	0.0226441	0.00367713	0.00737303	0.0346231	0.0433131	0.0390231	0.00365881	0.00733609		0.00334949	0	0.00480983	0.00607406	0.00706941	0.0100479	0.00343742	0.00576319	0.00334355
BA4	0.0110797	0.0148104	0.0148969	0.0110877	0.00365881	0.0110877	0.00365881	0.0111281	0.00733609	0.0110797	0.0148104	0.0148969	0.0111361	1.29603	0.0747477	0.00733609	0.0110877	0.0478358	0.0225431	0.0110797	0.0866556	0.00365881	0.00365881	0.0519649	0.0148104	0.0996815	0.0110797	0.0475679	0.0609886	0.0307421	0.0148969	0.0264863	0.00737303	0.0110877	0.0385709	0.0473787	0.0430405	0.00733609	0.00365881	0.00365881		0.00334949	0.00590874	0.00498137	0.006125	0.0107146	0.00481933	0.00478251	0.00461984
BA8	0.00736778	0.0110797	0.0186688	0.00737303	0.00733609	0.00737303	0	0.00739975	0.00365881	0.00736778	0.0110797	0.0186688	0.00740504	1.3026	0.0791239	0.00365881	0.00737303	0.0437286	0.0187378	0.0148104	0.082306	0	0	0.0478358	0.0110797	0.0950668	0.00736778	0.0434852	0.0652361	0.0346763	0.0111441	0.0226441	0.00367713	0.00737303	0.0346231	0.0433131	0.0390231	0.00365881	0.00733609	0	0.00365881		0.00480983	0.00607406	0.00706941	0.0100479	0.00343742	0.00576319	0.00334355
BA12	0.00736778	0.0110797	0.0186688	0.00737303	0.00733609	0.00737303	0.00733609	0.0148753	0.00365881	0.00736778	0.0110797	0.0186688	0.0148861	1.3156	0.0791239	0.00365881	0.00737303	0.0519649	0.0263676	0.0148104	0.082306	0.00733609	0.00733609	0.0478358	0.0110797	0.0950668	0.00736778	0.0434852	0.0652361	0.0346763	0.0111441	0.0226441	0.0110877	0.00737303	0.0346231	0.0433131	0.0390231	0.00365881	0.014746	0.00733609	0.0110318	0.00733609		0.00789389	0.00710649	0.0114851	0.00341298	0.00588089	0.00595626
BA13	0.0185597	0.0223276	0.0148969	0.0185732	0.0110318	0.0185732	0.0110318	0.0186415	0.014746	0.0185597	0.0223276	0.0148969	0.0186551	1.29603	0.0747477	0.014746	0.0185732	0.0561158	0.0302112	0.0110797	0.082306	0.0110318	0.0110318	0.0561158	0.0223276	0.108985	0.0185597	0.0557977	0.069506	0.0307421	0.0224596	0.0342291	0.0110877	0.0185732	0.0465267	0.0555733	0.0511376	0.014746	0.0110318	0.0110318	0.00733609	0.0110318	0.0184786		0.00811687	0.0106562	0.00706312	0.00694547	0.00682257
BA14	0.0149626	0.0187516	0.018863	0.0225765	0.00741034	0.0225765	0.0148969	0.0226609	0.0111441	0.0149626	0.0187516	0.018863	0.0226777	1.3026	0.0800925	0.0111441	0.0225765	0.0609886	0.034438	0.0149626	0.092143	0.0148969	0.0148969	0.0567635	0.0187516	0.105685	0.0149626	0.0522612	0.0660084	0.0350538	0.018863	0.0266461	0.0187654	0.0149736	0.0430066	0.0520496	0.0390231	0.0111441	0.0148969	0.0148969	0.0111441	0.0148969	0.0148969	0.0186688		0.0131425	0.00607827	0.00603737	0.00777615
BA19	0.0344118	0.0383342	0.0385709	0.034438	0.034255	0.034438	0.0265061	0.0345701	0.0303708	0.0344118	0.0383342	0.0385709	0.030486	1.41165	0.10375	0.0303708	0.034438	0.0745535	0.046709	0.0344118	0.111286	0.0265061	0.0265061	0.0745535	0.0383342	0.0994957	0.0344118	0.0647486	0.0978056	0.0557977	0.0385709	0.0509746	0.0266461	0.034438	0.0598464	0.0644826	0.0690414	0.0303708	0.0265061	0.0265061	0.0303708	0.0265061	0.034255	0.0303708	0.0425388		0.0108388	0.0108828	0.00930926
BA20	0.00367453	0.00736778	0.0148969	0.0110877	0.00365881	0.0110877	0.00365881	0.0111281	0	0.00367453	0.00736778	0.0148969	0.0111361	1.30913	0.0747477	0	0.0110877	0.0478358	0.0225431	0.0110797	0.0779781	0.00365881	0.00365881	0.0437286	0.00736778	0.0904769	0.00367453	0.0394239	0.0609886	0.0307421	0.00741034	0.0188213	0.00737303	0.00367713	0.0306953	0.0392688	0.0350265	0	0.0110318	0.00365881	0.00733609	0.00365881	0.00365881	0.014746	0.0111441	0.0303708		0.00461984	0.00478251
BA22	0.0110797	0.0148104	0.0148969	0.0185732	0.00365881	0.0185732	0.0110318	0.0186415	0.00733609	0.0110797	0.0148104	0.0148969	0.0186551	1.30913	0.0747477	0.00733609	0.0185732	0.0561158	0.0302112	0.0110797	0.0866556	0.0110318	0.0110318	0.0519649	0.0148104	0.0904769	0.0110797	0.0475679	0.0609886	0.0307421	0.0148969	0.0264863	0.0148211	0.0110877	0.0385709	0.0473787	0.0430405	0.00733609	0.00365881	0.0110318	0.00733609	0.0110318	0.0110318	0.014746	0.0111441	0.0303708	0.00733609		0.00481933
BA29	0.0110797	0.0148104	0.0224596	0.0110877	0.0110318	0.0110877	0.00365881	0.0111281	0.00733609	0.0110797	0.0148104	0.0224596	0.0111361	1.30913	0.0835232	0.00733609	0.0110877	0.0478358	0.0225431	0.0185597	0.0866556	0.00365881	0.00365881	0.0519649	0.0148104	0.0904769	0.0110797	0.0475679	0.069506	0.0386306	0.0148969	0.0264863	0.00737303	0.0110877	0.0385709	0.0473787	0.0430405	0.00733609	0.00365881	0.00365881	0.00733609	0.00365881	0.0110318	0.014746	0.0186688	0.0226609	0.00733609	0.00733609
BA32	0.00736778	0.0110797	0.0186688	0.00737303	0.00733609	0.00737303	0	0.00739975	0.00365881	0.00736778	0.0110797	0.0186688	0.00740504	1.3026	0.0791239	0.00365881	0.00737303	0.0437286	0.0187378	0.0148104	0.082306	0	0	0.0478358	0.0110797	0.0950668	0.00736778	0.0434852	0.0652361	0.0346763	0.0111441	0.0226441	0.00367713	0.00737303	0.0346231	0.0433131	0.0390231	0.00365881	0.00733609	0	0.00365881	0	0.00733609	0.0110318	0.0148969	0.0265061	0.00365881	0.0110318	0.00365881
BA33	0.0186551	0.0224431	0.0225765	0.00365881	0.0110877	0.00365881	0.0110877	0.0187378	0.0148211	0.0186551	0.0224431	0.0225765	0.0187516	1.33058	0.0840344	0.0148211	0.00365881	0.0564377	0.0303708	0.0186551	0.0915813	0.0110877	0.0110877	0.0606363	0.0224431	0.109697	0.0186551	0.0561158	0.0699174	0.0388409	0.0225765	0.0344118	0.0148969	0.0186688	0.0467826	0.0471161	0.0428049	0.0148211	0.0110877	0.0110877	0.00737303	0.0110877	0.0110877	0.0148211	0.0187654	0.0383636	0.0148211	0.0148211	0.0148211
BA34	0.00740504	0.0111361	0.0187654	0.00733609	0.00737303	0.00733609	0.00737303	0.0149517	0.00367713	0.00740504	0.0111361	0.0187654	0.0149626	1.33704	0.0796051	0.00367713	0.00733609	0.0522612	0.0265061	0.0148861	0.0784444	0.00737303	0.00737303	0.0481069	0.0111361	0.0956757	0.00740504	0.0437286	0.0656198	0.034864	0.0112011	0.0227629	0.0111441	0.00741034	0.0348102	0.0350538	0.0308839	0.00367713	0.0148211	0.00737303	0.0110877	0.00737303	0.00737303	0.0185732	0.0149736	0.034438	0.00367713	0.0110877	0.0110877
BA39	0.00736778	0.0110797	0.0186688	0.00737303	0.00733609	0.00737303	0	0.00739975	0.00365881	0.00736778	0.0110797	0.0186688	0.00740504	1.3026	0.0791239	0.00365881	0.00737303	0.0437286	0.0187378	0.0148104	0.082306	0	0	0.0478358	0.0110797	0.0950668	0.00736778	0.0434852	0.0652361	0.0346763	0.0111441	0.0226441	0.00367713	0.00737303	0.0346231	0.0433131	0.0390231	0.00365881	0.00733609	0	0.00365881	0	0.00733609	0.0110318	0.0148969	0.0265061	0.00365881	0.0110318	0.00365881
BA41	0.0110797	0.0148104	0.0224596	0.0110877	0.0110318	0.0110877	0.00365881	0.0111281	0.00733609	0.0110797	0.0148104	0.0224596	0.0111361	1.3026	0.0835232	0.00733609	0.0110877	0.0478358	0.0225431	0.0185597	0.0866556	0.00365881	0.00365881	0.0519649	0.0148104	0.0996815	0.0110797	0.0475679	0.069506	0.0346763	0.0148969	0.0264863	0.00737303	0.0110877	0.0385709	0.0473787	0.0430405	0.00733609	0.0110318	0.00365881	0.00733609	0.00365881	0.0110318	0.014746	0.0186688	0.0303708	0.00733609	0.014746	0.00733609
BA42	0.00736778	0.0110797	0.0186688	0.00737303	0.00733609	0.00737303	0	0.00739975	0.00365881	0.00736778	0.0110797	0.0186688	0.00740504	1.3026	0.0791239	0.00365881	0.00737303	0.0437286	0.0187378	0.0148104	0.082306	0	0	0.0478358	0.0110797	0.0950668	0.00736778	0.0434852	0.0652361	0.0346763	0.0111441	0.0226441	0.00367713	0.00737303	0.0346231	0.0433131	0.0390231	0.00365881	0.00733609	0	0.00365881	0	0.00733609	0.0110318	0.0148969	0.0265061	0.00365881	0.0110318	0.00365881
BA43	0.0148104	0.0185597	0.0186688	0.0148211	0.00733609	0.0148211	0.00733609	0.0148753	0.0110318	0.0148104	0.0185597	0.0186688	0.0148861	1.3026	0.0791239	0.0110318	0.0148211	0.0519649	0.0263676	0.0148104	0.0910269	0.00733609	0.00733609	0.0561158	0.0185597	0.104321	0.0148104	0.0516721	0.0652361	0.0346763	0.0186688	0.030348	0.0110877	0.0148211	0.0425388	0.0514655	0.0470787	0.0110318	0.00733609	0.00733609	0.00365881	0.00733609	0.014746	0.0110318	0.0148969	0.034255	0.0110318	0.0110318	0.0110318
BA44	0.0111281	0.0148753	0.0225598	0.0111361	0.0110797	0.0111361	0.00367453	0.00367453	0.00736778	0.0111281	0.0148753	0.0225598	0.0111849	1.32541	0.0839598	0.00736778	0.0111361	0.0480679	0.0226441	0.0186415	0.0871036	0.00367453	0.00367453	0.0522185	0.0148753	0.10023	0.0111281	0.0477973	0.0698577	0.0388107	0.0149626	0.0266061	0.00740504	0.0111361	0.0387505	0.0476061	0.0432445	0.00736778	0.0110797	0.00367453	0.00736778	0.00367453	0.0110797	0.0148104	0.0187516	0.0305091	0.00736778	0.0148104	0.00736778
BA46	0.0110797	0.0148104	0.0148969	0.0110877	0.00365881	0.0110877	0.00365881	0.0111281	0.00733609	0.0110797	0.0148104	0.0148969	0.0111361	1.29603	0.0747477	0.00733609	0.0110877	0.0478358	0.0225431	0.0110797	0.0866556	0.00365881	0.00365881	0.0519649	0.0148104	0.0996815	0.0110797	0.0475679	0.0609886	0.0307421	0.0148969	0.0264863	0.00737303	0.0110877	0.0385709	0.0473787	0.0430405	0.00733609	0.00365881	0.00365881	0	0.00365881	0.0110318	0.00733609	0.0111441	0.0303708	0.00733609	0.00733609	0.00733609
BA57	0.0111281	0.0148753	0.0225598	0.0111361	0.0110797	0.0111361	0.00367453	0.0111768	0.00736778	0.0111281	0.0148753	0.0225598	0.0111849	1.3026	0.0839598	0.00736778	0.0111361	0.0480679	0.0226441	0.0186415	0.0871036	0.00367453	0.00367453	0.0522185	0.0148753	0.10023	0.0111281	0.0477973	0.0698577	0.0388107	0.0149626	0.0266061	0.00740504	0.0111361	0.0387505	0.0476061	0.0432445	0.00736778	0.0110797	0.00367453	0.00736778	0.00367453	0.0110797	0.0148104	0.0187516	0.0305091	0.00736778	0.0148104	0.00736778
BA59	0.25769	0.251526	0.259674	0.287495	0.259674	0.287495	0.272193	0.289382	0.265922	0.265922	0.251526	0.259674	0.289814	1.48685	0.369263	0.265922	0.287495	0.338704	0.302788	0.245388	0.315102	0.272193	0.272193	0.329884	0.251526	0.467349	0.265922	0.296868	0.372432	0.295951	0.275134	0.259309	0.274734	0.274734	0.291121	0.321958	0.308796	0.265922	0.272193	0.272193	0.265922	0.272193	0.272193	0.25345	0.259674	0.31498	0.265922	0.265922	0.278487
BA60	0.0111281	0.0148753	0.0225598	0.0111361	0.0110797	0.0111361	0.00367453	0.00367453	0.00736778	0.0111281	0.0148753	0.0225598	0.0111849	1.32541	0.0839598	0.00736778	0.0111361	0.0480679	0.0226441	0.0186415	0.0871036	0.00367453	0.00367453	0.0522185	0.0148753	0.10023	0.0111281	0.0477973	0.0698577	0.0388107	0.0149626	0.0266061	0.00740504	0.0111361	0.0387505	0.0476061	0.0432445	0.00736778	0.0110797	0.00367453	0.00736778	0.00367453	0.0110797	0.0148104	0.0187516	0.0305091	0.00736778	0.0148104	0.00736778
BA61	0.00736778	0.0110797	0.0186688	0.00737303	0.00733609	0.00737303	0	0.00739975	0.00365881	0.00736778	0.0110797	0.0186688	0.00740504	1.3026	0.0791239	0.00365881	0.00737303	0.0437286	0.0187378	0.0148104	0.082306	0	0	0.0478358	0.0110797	0.0950668	0.00736778	0.0434852	0.0652361	0.0346763	0.0111441	0.0226441	0.00367713	0.00737303	0.0346231	0.0433131	0.0390231	0.00365881	0.00733609	0	0.00365881	0	0.00733609	0.0110318	0.0148969	0.0265061	0.00365881	0.0110318	0.00365881
BA63	0.0110797	0.0148104	0.0224596	0.0110877	0.0110318	0.0110877	0.00365881	0.0111281	0.00733609	0.0110797	0.0148104	0.0224596	0.0111361	1.3026	0.0835232	0.00733609	0.0110877	0.0478358	0.0225431	0.0185597	0.0866556	0.00365881	0.00365881	0.0519649	0.0148104	0.0996815	0.0110797	0.0475679	0.069506	0.0346763	0.0148969	0.0264863	0.00737303	0.0110877	0.0385709	0.0473787	0.0430405	0.00733609	0.0110318	0.00365881	0.00733609	0.00365881	0.0110318	0.014746	0.0186688	0.0303708	0.00733609	0.014746	0.00733609
BA64	0.00736778	0.0110797	0.0186688	0.00737303	0.00733609	0.00737303	0	0.00739975	0.00365881	0.00736778	0.0110797	0.0186688	0.00740504	1.3026	0.0791239	0.00365881	0.00737303	0.0437286	0.0187378	0.0148104	0.082306	0	0	0.0478358	0.0110797	0.0950668	0.00736778	0.0434852	0.0652361	0.0346763	0.0111441	0.0226441	0.00367713	0.00737303	0.0346231	0.0433131	0.0390231	0.00365881	0.00733609	0	0.00365881	0	0.00733609	0.0110318	0.0148969	0.0265061	0.00365881	0.0110318	0.00365881
BA68	0.0110797	0.0148104	0.00741034	0.0185732	0.00365881	0.0185732	0.0110318	0.0186415	0.00733609	0.0110797	0.0148104	0.00741034	0.0186551	1.3026	0.0660648	0.00733609	0.0185732	0.0561158	0.0302112	0.00367453	0.082306	0.0110318	0.0110318	0.0478358	0.0148104	0.0996815	0.0110797	0.0475679	0.0609886	0.0229346	0.0148969	0.0264863	0.0110877	0.0110877	0.0385709	0.0473787	0.0430405	0.00733609	0.0110318	0.0110318	0.00733609	0.0110318	0.0110318	0.00733609	0.0111441	0.0303708	0.00733609	0.00733609	0.014746
BA73	0.00736778	0.0110797	0.0186688	0.00737303	0.00733609	0.00737303	0	0.00739975	0.00365881	0.00736778	0.0110797	0.0186688	0.00740504	1.3026	0.0791239	0.00365881	0.00737303	0.0437286	0.0187378	0.0148104	0.082306	0	0	0.0478358	0.0110797	0.0950668	0.00736778	0.0434852	0.0652361	0.0346763	0.0111441	0.0226441	0.00367713	0.00737303	0.0346231	0.0433131	0.0390231	0.00365881	0.00733609	0	0.00365881	0	0.00733609	0.0110318	0.0148969	0.0265061	0.00365881	0.0110318	0.00365881
BA77	0.0149517	0.0187378	0.026526	0.0149626	0.0148861	0.0149626	0.00740504	0.00740504	0.0111361	0.0149517	0.0187378	0.026526	0.015029	1.33058	0.0889557	0.0111361	0.0149626	0.0525178	0.0266261	0.0225431	0.0920609	0.00740504	0.00740504	0.0567165	0.0187378	0.105584	0.0149517	0.0522185	0.0746181	0.0430405	0.018849	0.0306486	0.011193	0.0149626	0.0429728	0.0520072	0.0389926	0.0111361	0.0148861	0.00740504	0.0111361	0.00740504	0.0148861	0.0186551	0.0226777	0.0345965	0.0111361	0.0186551	0.0111361
BA79	0.0110797	0.0148104	0.0148969	0.0110877	0.00365881	0.0110877	0.00365881	0.0111281	0.00733609	0.0110797	0.0148104	0.0148969	0.0111361	1.29603	0.0747477	0.00733609	0.0110877	0.0478358	0.0225431	0.0110797	0.0866556	0.00365881	0.00365881	0.0519649	0.0148104	0.0996815	0.0110797	0.0475679	0.0609886	0.0307421	0.0148969	0.0264863	0.00737303	0.0110877	0.0385709	0.0473787	0.0430405	0.00733609	0.00365881	0.00365881	0	0.00365881	0.0110318	0.00733609	0.0111441	0.0303708	0.00733609	0.00733609	0.00733609
BA80	0.0148861	0.0186551	0.0187654	0.0148969	0.0148211	0.0148969	0.00737303	0.0149517	0.0110877	0.0148861	0.0186551	0.0187654	0.0149626	1.33058	0.0796051	0.0110877	0.0148969	0.0522612	0.0265061	0.0148861	0.0871802	0.00737303	0.00737303	0.0522612	0.0186551	0.104998	0.0148861	0.0519649	0.0742377	0.034864	0.0187654	0.0305091	0.00741034	0.0148969	0.0427714	0.0517558	0.0388107	0.0110877	0.0148211	0.00737303	0.0110877	0.00737303	0.0148211	0.0110877	0.0225765	0.0266461	0.0110877	0.0185732	0.0110877
BA81	0.0110797	0.0148104	0.0224596	0.0110877	0.0110318	0.0110877	0.00365881	0.0111281	0.00733609	0.0110797	0.0148104	0.0224596	0.0111361	1.3026	0.0835232	0.00733609	0.0110877	0.0478358	0.0225431	0.0185597	0.0866556	0.00365881	0.00365881	0.0519649	0.0148104	0.0996815	0.0110797	0.0475679	0.069506	0.0346763	0.0148969	0.0264863	0.00737303	0.0110877	0.0385709	0.0473787	0.0430405	0.00733609	0.0110318	0.00365881	0.00733609	0.00365881	0.0110318	0.014746	0.0186688	0.0303708	0.00733609	0.014746	0.00733609
BA86	0.0305322	0.034438	0.0268079	0.0305553	0.0226777	0.0305553	0.0226777	0.0306719	0.026526	0.0225765	0.034438	0.0268079	0.0306953	1.27497	0.0900733	0.026526	0.0305553	0.0702735	0.042738	0.0227799	0.106809	0.0226777	0.0226777	0.0702735	0.034438	0.12635	0.0225765	0.0698577	0.0844013	0.0435198	0.0346496	0.042738	0.0227969	0.0305553	0.0598954	0.069565	0.0471161	0.026526	0.0226777	0.0226777	0.018849	0.0226777	0.0303937	0.018849	0.0148861	0.0429728	0.026526	0.026526	0.026526
BA88	0.0224431	0.02625	0.0187654	0.0300982	0.0148211	0.0300982	0.022344	0.0302112	0.0185732	0.0224431	0.02625	0.0187654	0.0302339	1.2881	0.0796051	0.0185732	0.0300982	0.0690996	0.0420815	0.0148861	0.0871802	0.022344	0.022344	0.0606363	0.02625	0.104998	0.0224431	0.0602884	0.0742377	0.034864	0.0264069	0.0383342	0.0224596	0.0224596	0.050814	0.0600431	0.0555283	0.0185732	0.0148211	0.022344	0.0185732	0.022344	0.022344	0.0110877	0.0225765	0.034438	0.0185732	0.0110877	0.0185732
BA89	0.00367453	0.00736778	0.0148969	0.0110877	0.00365881	0.0110877	0.00365881	0.0111281	0	0.00367453	0.00736778	0.0148969	0.0111361	1.30913	0.0747477	0	0.0110877	0.0478358	0.0225431	0.0110797	0.0779781	0.00365881	0.00365881	0.0437286	0.00736778	0.0904769	0.00367453	0.0394239	0.0609886	0.0307421	0.00741034	0.0188213	0.00737303	0.00367713	0.0306953	0.0392688	0.0350265	0	0.0110318	0.00365881	0.00733609	0.00365881	0.00365881	0.014746	0.0111441	0.0303708	0	0.00733609	0.00733609
BA104	0.0148753	0.0186415	0.0263872	0.0148861	0.0148104	0.0148861	0.00736778	0.0149409	0.0110797	0.00733609	0.0186415	0.0263872	0.0149517	1.29603	0.0884079	0.0110797	0.0148861	0.0522185	0.0264863	0.0224266	0.0915002	0.00736778	0.00736778	0.0563912	0.0186415	0.104899	0.00733609	0.0519227	0.0741738	0.0428049	0.0187516	0.030486	0.0111361	0.0148861	0.042738	0.0517139	0.0388409	0.0110797	0.0148104	0.00736778	0.0110797	0.00736778	0.0148104	0.0185597	0.0225598	0.0344118	0.0110797	0.0185597	0.0110797
BA115	0.0110797	0.0148104	0.0148969	0.0110877	0.00365881	0.0110877	0.00365881	0.0111281	0.00733609	0.0110797	0.0148104	0.0148969	0.0111361	1.29603	0.0747477	0.00733609	0.0110877	0.0478358	0.0225431	0.0110797	0.0866556	0.00365881	0.00365881	0.0519649	0.0148104	0.0996815	0.0110797	0.0475679	0.0609886	0.0307421	0.0148969	0.0264863	0.00737303	0.0110877	0.0385709	0.0473787	0.0430405	0.00733609	0.00365881	0.00365881	0	0.00365881	0.0110318	0.00733609	0.0111441	0.0303708	0.00733609	0.00733609	0.00733609
BA137	0.0186551	0.0224431	0.0225765	0.0186688	0.0110877	0.0186688	0.0110877	0.0187378	0.0148211	0.0186551	0.0224431	0.0225765	0.0187516	1.32407	0.0840344	0.0148211	0.0186688	0.0564377	0.0303708	0.0186551	0.0960043	0.0110877	0.0110877	0.0606363	0.0224431	0.109697	0.0186551	0.0561158	0.0699174	0.034864	0.0225765	0.0344118	0.0148969	0.0186688	0.0467826	0.0558887	0.0428049	0.0148211	0.0110877	0.0110877	0.00737303	0.0110877	0.0185732	0.0148211	0.0187654	0.0383636	0.0148211	0.0148211	0.0148211
BA139	0.00365881	0	0.0225598	0.0186551	0.0110797	0.0186551	0.0110797	0.0187241	0.00736778	0.0111281	0	0.0225598	0.0187378	1.30913	0.0839598	0.00736778	0.0186551	0.0563912	0.030348	0.0186415	0.0775839	0.0110797	0.0110797	0.0394551	0	0.0955865	0.0111281	0.0352182	0.0698577	0.0388107	0.0149626	0.0111849	0.0148861	0.0111361	0.0305553	0.0476061	0.0432445	0.00736778	0.0185597	0.0110797	0.0148104	0.0110797	0.0110797	0.0223276	0.0187516	0.0383342	0.00736778	0.0148104	0.0148104
BA142	0.0110797	0.0148104	0.0224596	0.0110877	0.0110318	0.0110877	0.00365881	0.0111281	0.00733609	0.0110797	0.0148104	0.0224596	0.0111361	1.30913	0.0791239	0.00733609	0.0110877	0.0478358	0.0225431	0.0185597	0.0866556	0.00365881	0.00365881	0.0519649	0.0148104	0.0996815	0.0110797	0.0475679	0.069506	0.0386306	0.0148969	0.0264863	0.00737303	0.0110877	0.0385709	0.0473787	0.0430405	0.00733609	0.0110318	0.00365881	0.00733609	0.00365881	0.0110318	0.014746	0.0186688	0.0303708	0.00733609	0.014746	0.00733609
BA144	0.0263872	0.0302339	0.0226946	0.0110877	0.0186688	0.0110877	0.0186688	0.0265061	0.0224596	0.0263872	0.0302339	0.0226946	0.026526	1.35891	0.0845522	0.0224596	0.0110877	0.0652361	0.0383636	0.0187516	0.0965967	0.0186688	0.0186688	0.0652361	0.0302339	0.119965	0.0263872	0.064857	0.0790547	0.0390536	0.0304167	0.0425058	0.0187654	0.0264069	0.0551727	0.0555733	0.0511376	0.0224596	0.0186688	0.0186688	0.0148969	0.0186688	0.0186688	0.0148969	0.0265458	0.0385709	0.0224596	0.0224596	0.0224596
BA145	0.0148753	0.0186415	0.0187516	0.0148861	0.00736778	0.0148861	0.00736778	0.00736778	0.0110797	0.0148753	0.0186415	0.0187516	0.0149517	1.31891	0.079535	0.0110797	0.0148861	0.0522185	0.0264863	0.0148753	0.0915002	0.00736778	0.00736778	0.0563912	0.0186415	0.104899	0.0148753	0.0519227	0.0655642	0.034837	0.0187516	0.030486	0.0111361	0.0148861	0.042738	0.0517139	0.0473031	0.0110797	0.00736778	0.00736778	0.00367453	0.00736778	0.0148104	0.0110797	0.0149626	0.0344118	0.0110797	0.0110797	0.0110797
BA147	0.0148753	0.0186415	0.0187516	0.0148861	0.00736778	0.0148861	0.00736778	0.0149409	0.0110797	0.00733609	0.0186415	0.0187516	0.0149517	1.29603	0.079535	0.0110797	0.0148861	0.0522185	0.0264863	0.0148753	0.0915002	0.00736778	0.00736778	0.0563912	0.0186415	0.104899	0.00733609	0.0519227	0.0655642	0.034837	0.0187516	0.030486	0.0111361	0.0148861	0.042738	0.0517139	0.0388409	0.0110797	0.00736778	0.00736778	0.00367453	0.00736778	0.0148104	0.0110797	0.0149626	0.0344118	0.0110797	0.0110797	0.0110797
BA149	0.0148861	0.0186551	0.0264069	0	0.0148211	0	0.00737303	0.0149517	0.0110877	0.0148861	0.0186551	0.0264069	0.0149626	1.33704	0.0884871	0.0110877	0	0.0522612	0.0265061	0.0224431	0.0871802	0.00737303	0.00737303	0.0564377	0.0186551	0.104998	0.0148861	0.0519649	0.0742377	0.0428384	0.0187654	0.0305091	0.0111441	0.0148969	0.0427714	0.0430744	0.0388107	0.0110877	0.0148211	0.00737303	0.0110877	0.00737303	0.00737303	0.0185732	0.0225765	0.034438	0.0110877	0.0185732	0.0110877
BA162	0.0186551	0.0224431	0.0225765	0.00365881	0.0110877	0.00365881	0.0110877	0.0187378	0.0148211	0.0186551	0.0224431	0.0225765	0.0187516	1.33058	0.0840344	0.0148211	0.00365881	0.0564377	0.0303708	0.0186551	0.0915813	0.0110877	0.0110877	0.0606363	0.0224431	0.109697	0.0186551	0.0561158	0.0699174	0.0388409	0.0225765	0.0344118	0.0148969	0.0186688	0.0467826	0.0471161	0.0428049	0.0148211	0.0110877	0.0110877	0.00737303	0.0110877	0.0110877	0.0148211	0.0187654	0.0383636	0.0148211	0.0148211	0.0148211
BA166	0.0110797	0.0148104	0.0224596	0.0110877	0.0110318	0.0110877	0.00365881	0.0111281	0.00733609	0.0110797	0.0148104	0.0224596	0.0111361	1.30913	0.0835232	0.00733609	0.0110877	0.0478358	0.0225431	0.0185597	0.0866556	0.00365881	0.00365881	0.0519649	0.0148104	0.0904769	0.0110797	0.0475679	0.069506	0.0386306	0.0148969	0.0264863	0.00737303	0.0110877	0.0385709	0.0473787	0.0430405	0.00733609	0.00365881	0.00365881	0.00733609	0.00365881	0.0110318	0.014746	0.0186688	0.0226609	0.00733609	0.00733609	0
BA176	0.0148861	0.0186551	0.0264069	0	0.0148211	0	0.00737303	0.0149517	0.0110877	0.0148861	0.0186551	0.0264069	0.0149626	1.33704	0.0884871	0.0110877	0	0.0522612	0.0265061	0.0224431	0.0871802	0.00737303	0.00737303	0.0564377	0.0186551	0.104998	0.0148861	0.0519649	0.0742377	0.0428384	0.0187654	0.0305091	0.0111441	0.0148969	0.0427714	0.0430744	0.0388107	0.0110877	0.0148211	0.00737303	0.0110877	0.00737303	0.00737303	0.0185732	0.0225765	0.034438	0.0110877	0.0185732	0.0110877
BA179	0.00736778	0.0110797	0.0186688	0.00737303	0.00733609	0.00737303	0	0.00739975	0.00365881	0.00736778	0.0110797	0.0186688	0.00740504	1.3026	0.0791239	0.00365881	0.00737303	0.0437286	0.0187378	0.0148104	0.082306	0	0	0.0478358	0.0110797	0.0950668	0.00736778	0.0434852	0.0652361	0.0346763	0.0111441	0.0226441	0.00367713	0.00737303	0.0346231	0.0433131	0.0390231	0.00365881	0.00733609	0	0.00365881	0	0.00733609	0.0110318	0.0148969	0.0265061	0.00365881	0.0110318	0.00365881
BA182	0.0110318	0.00733609	0.0225598	0.0186551	0.0110797	0.0186551	0.0110797	0.0187241	0.0148104	0.0186415	0.00733609	0.0225598	0.0187378	1.29603	0.0839598	0.0148104	0.0186551	0.0563912	0.030348	0.0186415	0.0862125	0.0110797	0.0110797	0.0476061	0.00733609	0.104899	0.0186415	0.0432788	0.0698577	0.0388107	0.0225598	0.0187378	0.0148861	0.0186551	0.0383931	0.0558432	0.0513828	0.0148104	0.0110797	0.0110797	0.00736778	0.0110797	0.0185597	0.0148104	0.0187516	0.0383342	0.0148104	0.0148104	0.0148104
BA186	0.0111361	0.0148861	0.0225765	0.0111441	0.0110877	0.0111441	0.00367713	0.0111849	0.00737303	0.0111361	0.0148861	0.0225765	0.011193	1.33058	0.0840344	0.00737303	0.0111441	0.0481069	0.0226609	0.0186551	0.0871802	0.00367713	0.00367713	0.0522612	0.0148861	0.100324	0.0111361	0.0478358	0.0699174	0.0388409	0.0149736	0.0266261	0.00741034	0.0111441	0.0387806	0.0476444	0.0432788	0.00737303	0.0110877	0.00367713	0.00737303	0.00367713	0.0110877	0.0148211	0.0187654	0.0305322	0.00737303	0.0148211	0.00737303
BA192	0.00736778	0.0110797	0.0186688	0.00737303	0.00733609	0.00737303	0	0.00739975	0.00365881	0.00736778	0.0110797	0.0186688	0.00740504	1.3026	0.0791239	0.00365881	0.00737303	0.0437286	0.0187378	0.0148104	0.082306	0	0	0.0478358	0.0110797	0.0950668	0.00736778	0.0434852	0.0652361	0.0346763	0.0111441	0.0226441	0.00367713	0.00737303	0.0346231	0.0433131	0.0390231	0.00365881	0.00733609	0	0.00365881	0	0.00733609	0.0110318	0.0148969	0.0265061	0.00365881	0.0110318	0.00365881
BA196	0.0110797	0.0148104	0.0224596	0.0110877	0.0110318	0.0110877	0.00365881	0.0111281	0.00733609	0.0110797	0.0148104	0.0224596	0.0111361	1.3026	0.0835232	0.00733609	0.0110877	0.0478358	0.0225431	0.0185597	0.0866556	0.00365881	0.00365881	0.0519649	0.0148104	0.0996815	0.0110797	0.0475679	0.069506	0.0346763	0.0148969	0.0264863	0.00737303	0.0110877	0.0385709	0.0473787	0.0430405	0.00733609	0.0110318	0.00365881	0.00733609	0.00365881	0.0110318	0.014746	0.0186688	0.0303708	0.00733609	0.014746	0.00733609
BA208	0.0110797	0.0148104	0.0224596	0.0110877	0.0110318	0.0110877	0.00365881	0.0111281	0.00733609	0.0110797	0.0148104	0.0224596	0.0111361	1.30913	0.0791239	0.00733609	0.0110877	0.0478358	0.0225431	0.0185597	0.0866556	0.00365881	0.00365881	0.0519649	0.0148104	0.0996815	0.0110797	0.0475679	0.069506	0.0386306	0.0148969	0.0264863	0.00737303	0.0110877	0.0385709	0.0473787	0.0430405	0.00733609	0.0110318	0.00365881	0.00733609	0.00365881	0.0110318	0.014746	0.0186688	0.0303708	0.00733609	0.014746	0.00733609
BA214	0.0387806	0.0427714	0.018849	0.0468195	0.0307187	0.0468195	0.0386008	0.0470041	0.0346496	0.0387806	0.0427714	0.018849	0.0470413	1.411	0.100514	0.0346496	0.0468195	0.0888756	0.0595563	0.0308602	0.11283	0.0386008	0.0386008	0.0799506	0.0427714	0.127348	0.0387806	0.079465	0.0651811	0.0350265	0.0430405	0.055707	0.0388107	0.0388107	0.0598954	0.069565	0.0742377	0.0346496	0.0386008	0.0386008	0.0346496	0.0386008	0.0386008	0.0307187	0.0390231	0.0511376	0.0346496	0.0346496	0.042572
BA217	0.00739975	0.0111281	0.0187516	0.0148861	0.00736778	0.0148861	0.00736778	0.0149409	0.00367453	0	0.0111281	0.0187516	0.0149517	1.30913	0.079535	0.00367453	0.0148861	0.0522185	0.0264863	0.0148753	0.082729	0.00736778	0.00736778	0.0480679	0.0111281	0.0955865	0	0.0436936	0.0655642	0.034837	0.011193	0.0227459	0.0111361	0.00740504	0.0347833	0.0435198	0.0309075	0.00367453	0.0148104	0.00736778	0.0110797	0.00736778	0.00736778	0.0185597	0.0149626	0.0344118	0.00367453	0.0110797	0.0110797
BA219	0.0111281	0.0148753	0.0149626	0.0186551	0.00367453	0.0186551	0.0110797	0.0187241	0.00736778	0.00365881	0.0148753	0.0149626	0.0187378	1.3026	0.0751336	0.00736778	0.0186551	0.0563912	0.030348	0.0111281	0.0871036	0.0110797	0.0110797	0.0522185	0.0148753	0.10023	0.00365881	0.0477973	0.0612935	0.0308839	0.0149626	0.0266061	0.0148861	0.0111361	0.0387505	0.0476061	0.034864	0.00736778	0.0110797	0.0110797	0.00736778	0.0110797	0.0110797	0.0148104	0.011193	0.0383342	0.00736778	0.00736778	0.0148104
FU2	0.0186415	0.0224266	0.0225598	0.0186551	0.0110797	0.0186551	0.0110797	0.0187241	0.0148104	0.0110318	0.0224266	0.0225598	0.0187378	1.2894	0.0839598	0.0148104	0.0186551	0.0563912	0.030348	0.0186415	0.0959187	0.0110797	0.0110797	0.060586	0.0224266	0.109592	0.0110318	0.0560699	0.0698577	0.0388107	0.0225598	0.0343856	0.0148861	0.0186551	0.0467457	0.0558432	0.0428384	0.0148104	0.0110797	0.0110797	0.00736778	0.0110797	0.0185597	0.0148104	0.0187516	0.0383342	0.0148104	0.0148104	0.0148104
FU3	0.00736778	0.0110797	0.0186688	0.00737303	0.00733609	0.00737303	0	0.00739975	0.00365881	0.00736778	0.0110797	0.0186688	0.00740504	1.3026	0.0791239	0.00365881	0.00737303	0.0437286	0.0187378	0.0148104	0.082306	0	0	0.0478358	0.0110797	0.0950668	0.00736778	0.0434852	0.0652361	0.0346763	0.0111441	0.0226441	0.00367713	0.00737303	0.0346231	0.0433131	0.0390231	0.00365881	0.00733609	0	0.00365881	0	0.00733609	0.0110318	0.0148969	0.0265061	0.00365881	0.0110318	0.00365881
FU4	0.0111361	0.0148861	0.0225765	0.0111441	0.0110877	0.0111441	0.00367713	0.0111849	0.00737303	0.0111361	0.0148861	0.0225765	0.011193	1.33058	0.0840344	0.00737303	0.0111441	0.0481069	0.0226609	0.0186551	0.0871802	0.00367713	0.00367713	0.0522612	0.0148861	0.100324	0.0111361	0.0478358	0.0699174	0.0388409	0.0149736	0.0266261	0.00741034	0.0111441	0.0387806	0.0476444	0.034837	0.00737303	0.0110877	0.00367713	0.00737303	0.00367713	0.0110877	0.0148211	0.0187654	0.0305322	0.00737303	0.0148211	0.00737303
FU6	0.0225431	0.0263676	0.018849	0.0225598	0.0148861	0.0225598	0.0148861	0.0148861	0.0186551	0.0225431	0.0263676	0.018849	0.0226609	1.32407	0.0800215	0.0186551	0.0225598	0.0609376	0.0344118	0.0149517	0.0965099	0.0148861	0.0148861	0.0609376	0.0263676	0.115068	0.0225431	0.060586	0.0746181	0.0350265	0.026526	0.0385115	0.0149626	0.0225598	0.051056	0.0603382	0.0470413	0.0186551	0.0148861	0.0148861	0.0111361	0.0148861	0.0224431	0.0111361	0.0226777	0.0345965	0.0186551	0.0186551	0.0186551
FU8	0.0225598	0.0263872	0.0265458	0.0225765	0.0224596	0.0225765	0.0148969	0.0226609	0.0186688	0.0225598	0.0263872	0.0265458	0.0187378	1.3026	0.0890359	0.0186688	0.0225765	0.0609886	0.034438	0.0225598	0.0965967	0.0148969	0.0148969	0.0609886	0.0263872	0.0848477	0.0225598	0.0430066	0.0834496	0.0430744	0.0265458	0.0385412	0.0149736	0.0225765	0.0470413	0.0514655	0.0558432	0.0186688	0.0148969	0.0148969	0.0186688	0.0148969	0.0224596	0.0186688	0.0304167	0.0188351	0.0186688	0.0186688	0.0111441
FU9	0.00367453	0.00736778	0.0148969	0.0110877	0.00365881	0.0110877	0.00365881	0.0111281	0	0.00367453	0.00736778	0.0148969	0.0111361	1.30913	0.0747477	0	0.0110877	0.0478358	0.0225431	0.0110797	0.0779781	0.00365881	0.00365881	0.0437286	0.00736778	0.0904769	0.00367453	0.0394239	0.0609886	0.0307421	0.00741034	0.0188213	0.00737303	0.00367713	0.0306953	0.0392688	0.0350265	0	0.0110318	0.00365881	0.00733609	0.00365881	0.00365881	0.014746	0.0111441	0.0303708	0	0.00733609	0.00733609
FU11	0.0226777	0.026526	0.00367713	0.0304167	0.0149736	0.0304167	0.0225765	0.0305322	0.0187654	0.0226777	0.026526	0.00367713	0.0305553	1.3876	0.0805864	0.0187654	0.0304167	0.0699174	0.0425388	0.01504	0.0971971	0.0225765	0.0225765	0.0613451	0.026526	0.115949	0.0226777	0.0609886	0.0564377	0.0189616	0.0266863	0.0387505	0.0226946	0.0226946	0.0513828	0.0607373	0.0473409	0.0187654	0.0225765	0.0225765	0.0187654	0.0225765	0.0225765	0.0187654	0.022814	0.0427714	0.0187654	0.0187654	0.0264069
FU12	0.0110797	0.0148104	0.0148969	0.0110877	0.00365881	0.0110877	0.00365881	0.0111281	0.00733609	0.0110797	0.0148104	0.0148969	0.0111361	1.29603	0.0747477	0.00733609	0.0110877	0.0478358	0.0225431	0.0110797	0.0866556	0.00365881	0.00365881	0.0519649	0.0148104	0.0996815	0.0110797	0.0475679	0.0609886	0.0307421	0.0148969	0.0264863	0.00737303	0.0110877	0.0385709	0.0473787	0.0430405	0.00733609	0.00365881	0.00365881	0	0.00365881	0.0110318	0.00733609	0.0111441	0.0303708	0.00733609	0.00733609	0.00733609
FU16	0.00736778	0.0110797	0.0186688	0.00737303	0.00733609	0.00737303	0	0.00739975	0.00365881	0.00736778	0.0110797	0.0186688	0.00740504	1.3026	0.0791239	0.00365881	0.00737303	0.0437286	0.0187378	0.0148104	0.082306	0	0	0.0478358	0.0110797	0.0950668	0.00736778	0.0434852	0.0652361	0.0346763	0.0111441	0.0226441	0.00367713	0.00737303	0.0346231	0.0433131	0.0390231	0.00365881	0.00733609	0	0.00365881	0	0.00733609	0.0110318	0.0148969	0.0265061	0.00365881	0.0110318	0.00365881
FU17	0.434042	0.434042	0.447925	0.450063	0.414771	0.450063	0.429734	0.429734	0.422254	0.434042	0.434042	0.447925	0.454675	2.13357	0.578065	0.422254	0.450063	0.484043	0.450063	0.434042	0.521226	0.429734	0.429734	0.505059	0.434042	0.471402	0.434042	0.478162	0.505241	0.422254	0.447925	0.447013	0.442489	0.434906	0.488738	0.518949	0.524665	0.422254	0.414771	0.429734	0.422254	0.429734	0.429734	0.437209	0.422254	0.461378	0.422254	0.407288	0.422254
FU18	0.0110797	0.0148104	0.00741034	0.0185732	0.00365881	0.0185732	0.0110318	0.0186415	0.00733609	0.0110797	0.0148104	0.00741034	0.0186551	1.3026	0.0660648	0.00733609	0.0185732	0.0561158	0.0302112	0.00367453	0.082306	0.0110318	0.0110318	0.0478358	0.0148104	0.0996815	0.0110797	0.0475679	0.0609886	0.0229346	0.0148969	0.0264863	0.0110877	0.0110877	0.0385709	0.0473787	0.0430405	0.00733609	0.0110318	0.0110318	0.00733609	0.0110318	0.0110318	0.00733609	0.0111441	0.0303708	0.00733609	0.00733609	0.014746
FU22	0.00736778	0.0110797	0.0186688	0.00737303	0.00733609	0.00737303	0	0.00739975	0.00365881	0.00736778	0.0110797	0.0186688	0.00740504	1.3026	0.0791239	0.00365881	0.00737303	0.0437286	0.0187378	0.0148104	0.082306	0	0	0.0478358	0.0110797	0.0950668	0.00736778	0.0434852	0.0652361	0.0346763	0.0111441	0.0226441	0.00367713	0.00737303	0.0346231	0.0433131	0.0390231	0.00365881	0.00733609	0	0.00365881	0	0.00733609	0.0110318	0.0148969	0.0265061	0.00365881	0.0110318	0.00365881
FU26	0.00736778	0.0110797	0.0111441	0.0148211	0	0.0148211	0.00733609	0.0148753	0.00365881	0.00736778	0.0110797	0.0111441	0.0148861	1.3026	0.0703946	0.00365881	0.0148211	0.0519649	0.0263676	0.00736778	0.082306	0.00733609	0.00733609	0.0478358	0.0110797	0.0950668	0.00736778	0.0434852	0.0567635	0.0268282	0.0111441	0.0226441	0.0110877	0.00737303	0.0346231	0.0433131	0.0390231	0.00365881	0.00733609	0.00733609	0.00365881	0.00733609	0.00733609	0.0110318	0.00741034	0.034255	0.00365881	0.00365881	0.0110318
FU33	0.0110797	0.0148104	0.00741034	0.0185732	0.00365881	0.0185732	0.0110318	0.0186415	0.00733609	0.0110797	0.0148104	0.00741034	0.0186551	1.3026	0.0660648	0.00733609	0.0185732	0.0561158	0.0302112	0.00367453	0.082306	0.0110318	0.0110318	0.0478358	0.0148104	0.0996815	0.0110797	0.0475679	0.0609886	0.0229346	0.0148969	0.0264863	0.0110877	0.0110877	0.0385709	0.0473787	0.0430405	0.00733609	0.0110318	0.0110318	0.00733609	0.0110318	0.0110318	0.00733609	0.0111441	0.0303708	0.00733609	0.00733609	0.014746
FU37	0.0263872	0.0302339	0.0226946	0.0264069	0.0186688	0.0264069	0.0186688	0.0265061	0.0224596	0.0263872	0.0302339	0.0226946	0.026526	1.34597	0.0845522	0.0224596	0.0264069	0.0652361	0.0383636	0.0187516	0.092143	0.0186688	0.0186688	0.0561158	0.0302339	0.119965	0.0263872	0.064857	0.0790547	0.0390536	0.0304167	0.0425058	0.0187654	0.0264069	0.0465267	0.0555733	0.0511376	0.0224596	0.0186688	0.0186688	0.0148969	0.0186688	0.0262694	0.00741034	0.0265458	0.0385709	0.0224596	0.0224596	0.0224596
FU38	0.0110797	0.0148104	0.0148969	0.0110877	0.00365881	0.0110877	0.00365881	0.0111281	0.00733609	0.0110797	0.0148104	0.0148969	0.0111361	1.29603	0.0747477	0.00733609	0.0110877	0.0478358	0.0225431	0.0110797	0.0866556	0.00365881	0.00365881	0.0519649	0.0148104	0.0996815	0.0110797	0.0475679	0.0609886	0.0307421	0.0148969	0.0264863	0.00737303	0.0110877	0.0385709	0.0473787	0.0430405	0.00733609	0.00365881	0.00365881	0	0.00365881	0.0110318	0.00733609	0.0111441	0.0303708	0.00733609	0.00733609	0.00733609
FU41	0.0111361	0.0148861	0.0225765	0.0111441	0.0110877	0.0111441	0.00367713	0.0111849	0.00737303	0.0111361	0.0148861	0.0225765	0.011193	1.29759	0.0840344	0.00737303	0.0111441	0.0481069	0.0226609	0.0186551	0.0871802	0.00367713	0.00367713	0.0522612	0.0148861	0.100324	0.0111361	0.0478358	0.0699174	0.0388409	0.0149736	0.0266261	0.00741034	0.0111441	0.0387806	0.0476444	0.0432788	0.00737303	0.0110877	0.00367713	0.00737303	0.00367713	0.0110877	0.0148211	0.0187654	0.0305322	0.00737303	0.0148211	0.00737303
FU45	0.0110797	0.0148104	0.0148969	0.0110877	0.00365881	0.0110877	0.00365881	0.0111281	0.00733609	0.0110797	0.0148104	0.0148969	0.0111361	1.29603	0.0747477	0.00733609	0.0110877	0.0478358	0.0225431	0.0110797	0.0866556	0.00365881	0.00365881	0.0519649	0.0148104	0.0996815	0.0110797	0.0475679	0.0609886	0.0307421	0.0148969	0.0264863	0.00737303	0.0110877	0.0385709	0.0473787	0.0430405	0.00733609	0.00365881	0.00365881	0	0.00365881	0.0110318	0.00733609	0.0111441	0.0303708	0.00733609	0.00733609	0.00733609
FU54	0.00736778	0.0110797	0.0186688	0.00737303	0.00733609	0.00737303	0	0.00739975	0.00365881	0.00736778	0.0110797	0.0186688	0.00740504	1.3026	0.0791239	0.00365881	0.00737303	0.0437286	0.0187378	0.0148104	0.082306	0	0	0.0478358	0.0110797	0.0950668	0.00736778	0.0434852	0.0652361	0.0346763	0.0111441	0.0226441	0.00367713	0.00737303	0.0346231	0.0433131	0.0390231	0.00365881	0.00733609	0	0.00365881	0	0.00733609	0.0110318	0.0148969	0.0265061	0.00365881	0.0110318	0.00365881
FU56	0.0110797	0.0148104	0.0224596	0.0110877	0.0110318	0.0110877	0.00365881	0.0111281	0.00733609	0.0110797	0.0148104	0.0224596	0.0111361	1.30913	0.0835232	0.00733609	0.0110877	0.0478358	0.0225431	0.0185597	0.0866556	0.00365881	0.00365881	0.0519649	0.0148104	0.0904769	0.0110797	0.0475679	0.069506	0.0386306	0.0148969	0.0264863	0.00737303	0.0110877	0.0385709	0.0473787	0.0430405	0.00733609	0.00365881	0.00365881	0.00733609	0.00365881	0.0110318	0.014746	0.0186688	0.0226609	0.00733609	0.00733609	0
FU59	0.730093	0.738724	0.744584	0.749549	0.711817	0.749549	0.720475	0.720475	0.711817	0.730093	0.738724	0.744584	0.759587	2.46969	0.916054	0.711817	0.749549	0.827589	0.740984	0.721373	0.865103	0.720475	0.720475	0.836101	0.738724	0.793782	0.730093	0.816358	0.844362	0.735758	0.753317	0.759587	0.73233	0.691782	0.747267	0.819054	0.797538	0.711817	0.720475	0.720475	0.720475	0.720475	0.720475	0.711817	0.720475	0.753317	0.711817	0.711817	0.720475
FU70	0.00736778	0.0110797	0.0186688	0.00737303	0.00733609	0.00737303	0	0.00739975	0.00365881	0.00736778	0.0110797	0.0186688	0.00740504	1.3026	0.0791239	0.00365881	0.00737303	0.0437286	0.0187378	0.0148104	0.082306	0	0	0.0478358	0.0110797	0.0950668	0.00736778	0.0434852	0.0652361	0.0346763	0.0111441	0.0226441	0.00367713	0.00737303	0.0346231	0.0433131	0.0390231	0.00365881	0.00733609	0	0.00365881	0	0.00733609	0.0110318	0.0148969	0.0265061	0.00365881	0.0110318	0.00365881
FU77	0.00367453	0.00736778	0.0148969	0.0110877	0.00365881	0.0110877	0.00365881	0.0111281	0	0.00367453	0.00736778	0.0148969	0.0111361	1.30913	0.0747477	0	0.0110877	0.0478358	0.0225431	0.0110797	0.0779781	0.00365881	0.00365881	0.0437286	0.00736778	0.0904769	0.00367453	0.0394239	0.0609886	0.0307421	0.00741034	0.0188213	0.00737303	0.00367713	0.0306953	0.0392688	0.0350265	0	0.0110318	0.00365881	0.00733609	0.00365881	0.00365881	0.014746	0.0111441	0.0303708	0	0.00733609	0.00733609
FU86	0.0110797	0.0148104	0.00741034	0.0185732	0.00365881	0.0185732	0.0110318	0.0186415	0.00733609	0.0110797	0.0148104	0.00741034	0.0186551	1.3026	0.0660648	0.00733609	0.0185732	0.0561158	0.0302112	0.00367453	0.082306	0.0110318	0.0110318	0.0478358	0.0148104	0.0996815	0.0110797	0.0475679	0.0609886	0.0229346	0.0148969	0.0264863	0.0110877	0.0110877	0.0385709	0.0473787	0.0430405	0.00733609	0.0110318	0.0110318	0.00733609	0.0110318	0.0110318	0.00733609	0.0111441	0.0303708	0.00733609	0.00733609	0.014746
FU90	0.0306719	0.0345965	0.0269307	0.0385709	0.0227799	0.0385709	0.0305322	0.0387204	0.0266461	0.0306719	0.0345965	0.0269307	0.0387505	1.32407	0.0905601	0.0266461	0.0385709	0.0470413	0.0510153	0.022883	0.10739	0.0305322	0.0305322	0.0567165	0.0345965	0.12709	0.0306719	0.0702131	0.0848477	0.0437286	0.0348102	0.0471902	0.0306953	0.0306953	0.0557523	0.0699174	0.0651811	0.0266461	0.0305322	0.0305322	0.0266461	0.0305322	0.0305322	0.0266461	0.0308602	0.0513003	0.0266461	0.0266461	0.034438
FU92	0.00736778	0.0110797	0.0186688	0.00737303	0.00733609	0.00737303	0	0.00739975	0.00365881	0.00736778	0.0110797	0.0186688	0.00740504	1.3026	0.0791239	0.00365881	0.00737303	0.0437286	0.0187378	0.0148104	0.082306	0	0	0.0478358	0.0110797	0.0950668	0.00736778	0.0434852	0.0652361	0.0346763	0.0111441	0.0226441	0.00367713	0.00737303	0.0346231	0.0433131	0.0390231	0.00365881	0.00733609	0	0.00365881	0	0.00733609	0.0110318	0.0148969	0.0265061	0.00365881	0.0110318	0.00365881
FU97	0.0110797	0.0148104	0.0148969	0.0110877	0.00365881	0.0110877	0.00365881	0.0111281	0.00733609	0.0110797	0.0148104	0.0148969	0.0111361	1.29603	0.0747477	0.00733609	0.0110877	0.0478358	0.0225431	0.0110797	0.0866556	0.00365881	0.00365881	0.0519649	0.0148104	0.0996815	0.0110797	0.0475679	0.0609886	0.0307421	0.0148969	0.0264863	0.00737303	0.0110877	0.0385709	0.0473787	0.0430405	0.00733609	0.00365881	0.00365881	0	0.00365881	0.0110318	0.00733609	0.0111441	0.0303708	0.00733609	0.00733609	0.00733609
FU101	0.0111361	0.0148861	0.0225765	0.0111441	0.0110877	0.0111441	0.00367713	0.0111849	0.00737303	0.0111361	0.0148861	0.0225765	0.011193	1.33058	0.0840344	0.00737303	0.0111441	0.0481069	0.0226609	0.0186551	0.0871802	0.00367713	0.00367713	0.0522612	0.0148861	0.100324	0.0111361	0.0478358	0.0699174	0.0388409	0.0149736	0.0266261	0.00741034	0.0111441	0.0387806	0.0476444	0.034837	0.00737303	0.0110877	0.00367713	0.00737303	0.00367713	0.0110877	0.0148211	0.0187654	0.0305322	0.00737303	0.0148211	0.00737303
FU102	0.0186551	0.0224431	0.0225765	0.00365881	0.0110877	0.00365881	0.0110877	0.0187378	0.0148211	0.0186551	0.0224431	0.0225765	0.0187516	1.33058	0.0840344	0.0148211	0.00365881	0.0564377	0.0303708	0.0186551	0.0915813	0.0110877	0.0110877	0.0606363	0.0224431	0.109697	0.0186551	0.0561158	0.0699174	0.0388409	0.0225765	0.0344118	0.0148969	0.0186688	0.0467826	0.0471161	0.0428049	0.0148211	0.0110877	0.0110877	0.00737303	0.0110877	0.0110877	0.0148211	0.0187654	0.0383636	0.0148211	0.0148211	0.0148211
FU103	0.0148861	0.0186551	0.0264069	0.0148969	0.0148211	0.0148969	0.00737303	0.0149517	0.0110877	0.0148861	0.0186551	0.0264069	0.0111281	1.33058	0.0884871	0.0110877	0.0148969	0.0522612	0.0265061	0.0224431	0.0915813	0.00737303	0.00737303	0.0564377	0.0186551	0.0853764	0.0148861	0.0432445	0.0742377	0.0428384	0.0187654	0.0305091	0.0111441	0.0148969	0.0387806	0.0430744	0.0473409	0.0110877	0.00737303	0.00737303	0.0110877	0.00737303	0.0148211	0.0185732	0.0225765	0.0187378	0.0110877	0.0110877	0.00367713
FU104	0.0306953	0.0267877	0.0432103	0.0470041	0.0308366	0.0470041	0.0387505	0.0471902	0.0347833	0.0389318	0.0267877	0.0432103	0.0472278	1.29953	0.110419	0.0347833	0.0470041	0.0746828	0.0597974	0.0389318	0.0971091	0.0387505	0.0387505	0.0660084	0.0267877	0.133747	0.0389318	0.065952	0.0949788	0.0609376	0.0432103	0.0391455	0.0429728	0.0389622	0.0602386	0.079465	0.0745535	0.0347833	0.0387505	0.0387505	0.0347833	0.0387505	0.0387505	0.042738	0.0391762	0.0685261	0.0347833	0.0347833	0.042738
FU108	0.00736778	0.0110797	0.0186688	0.00737303	0.00733609	0.00737303	0	0.00739975	0.00365881	0.00736778	0.0110797	0.0186688	0.00740504	1.3026	0.0791239	0.00365881	0.00737303	0.0437286	0.0187378	0.0148104	0.082306	0	0	0.0478358	0.0110797	0.0950668	0.00736778	0.0434852	0.0652361	0.0346763	0.0111441	0.0226441	0.00367713	0.00737303	0.0346231	0.0433131	0.0390231	0.00365881	0.00733609	0	0.00365881	0	0.00733609	0.0110318	0.0148969	0.0265061	0.00365881	0.0110318	0.00365881
FU110	0.508021	0.508021	0.52518	0.526206	0.493779	0.526206	0.502172	0.531153	0.493779	0.508021	0.508021	0.52518	0.515258	1.82048	0.750757	0.493779	0.526206	0.534643	0.564685	0.502172	0.55225	0.502172	0.502172	0.541615	0.508021	0.658094	0.508021	0.491489	0.682747	0.593995	0.493779	0.509239	0.517737	0.509239	0.540247	0.515285	0.581762	0.493779	0.493779	0.502172	0.502172	0.502172	0.502172	0.502172	0.493779	0.539664	0.493779	0.485364	0.493779
FU111	0.011193	0.0149626	0.0226946	0.0187654	0.0111441	0.0187654	0.0111441	0.0188351	0.00741034	0.011193	0.0149626	0.0226946	0.018849	1.3156	0.0845522	0.00741034	0.0187654	0.0567635	0.0305322	0.0187516	0.0877117	0.0111441	0.0111441	0.0525611	0.0149626	0.0950668	0.011193	0.0481069	0.070334	0.0390536	0.015051	0.0267674	0.0149736	0.0112011	0.0389926	0.0479132	0.0350265	0.00741034	0.0186688	0.0111441	0.0148969	0.0111441	0.0111441	0.0224596	0.018863	0.0385709	0.00741034	0.0148969	0.0148969
FU115	0.00736778	0.0110797	0.0186688	0.00737303	0.00733609	0.00737303	0	0.00739975	0.00365881	0.00736778	0.0110797	0.0186688	0.00740504	1.3026	0.0791239	0.00365881	0.00737303	0.0437286	0.0187378	0.0148104	0.082306	0	0	0.0478358	0.0110797	0.0950668	0.00736778	0.0434852	0.0652361	0.0346763	0.0111441	0.0226441	0.00367713	0.00737303	0.0346231	0.0433131	0.0390231	0.00365881	0.00733609	0	0.00365881	0	0.00733609	0.0110318	0.0148969	0.0265061	0.00365881	0.0110318	0.00365881
FU121	0.00367453	0.00736778	0.0148969	0.0110877	0.00365881	0.0110877	0.00365881	0.0111281	0	0.00367453	0.00736778	0.0148969	0.0111361	1.30913	0.0747477	0	0.0110877	0.0478358	0.0225431	0.0110797	0.0779781	0.00365881	0.00365881	0.0437286	0.00736778	0.0904769	0.00367453	0.0394239	0.0609886	0.0307421	0.00741034	0.0188213	0.00737303	0.00367713	0.0306953	0.0392688	0.0350265	0	0.0110318	0.00365881	0.00733609	0.00365881	0.00365881	0.014746	0.0111441	0.0303708	0	0.00733609	0.00733609
FU133	0.069506	0.0652361	0.079465	0.0789857	0.0698577	0.0789857	0.0698577	0.0793256	0.0741738	0.0741738	0.0652361	0.079465	0.0793952	1.27145	0.156857	0.0741738	0.0789857	0.0947274	0.0932046	0.0745535	0.118158	0.0698577	0.0698577	0.0839598	0.0652361	0.190079	0.0741738	0.105786	0.144164	0.0997747	0.0838854	0.0793952	0.0651811	0.0789857	0.0927956	0.125745	0.10375	0.0741738	0.0698577	0.0698577	0.0655642	0.0698577	0.0785125	0.0698577	0.079465	0.0983319	0.0741738	0.0741738	0.0741738
FU151	0.00736778	0.0110797	0.0186688	0.00737303	0.00733609	0.00737303	0	0.00739975	0.00365881	0.00736778	0.0110797	0.0186688	0.00740504	1.3026	0.0791239	0.00365881	0.00737303	0.0437286	0.0187378	0.0148104	0.082306	0	0	0.0478358	0.0110797	0.0950668	0.00736778	0.0434852	0.0652361	0.0346763	0.0111441	0.0226441	0.00367713	0.00737303	0.0346231	0.0433131	0.0390231	0.00365881	0.00733609	0	0.00365881	0	0.00733609	0.0110318	0.0148969	0.0265061	0.00365881	0.0110318	0.00365881
FU152	0.447013	0.454675	0.434906	0.455609	0.434906	0.455609	0.442489	0.430576	0.434906	0.447013	0.454675	0.434906	0.460359	2.15879	0.513138	0.434906	0.455609	0.504118	0.475869	0.415573	0.561114	0.442489	0.442489	0.531889	0.454675	0.718309	0.447013	0.55689	0.498392	0.447013	0.434906	0.468121	0.447925	0.422254	0.4594	0.387114	0.473079	0.434906	0.442489	0.442489	0.442489	0.442489	0.442489	0.427318	0.448843	0.46714	0.434906	0.434906	0.442489
FU163	0.0187516	0.0225598	0.0226946	0.0187654	0.0111441	0.0187654	0.0111441	0.0188351	0.0148969	0.0187516	0.0225598	0.0226946	0.018849	1.32928	0.0845522	0.0148969	0.0187654	0.0478358	0.0305322	0.0187516	0.0965967	0.0111441	0.0111441	0.0519649	0.0225598	0.110419	0.0187516	0.0564377	0.070334	0.0390536	0.0226946	0.0345965	0.0149736	0.0187654	0.0470413	0.0562079	0.0430405	0.0148969	0.0111441	0.0111441	0.00741034	0.0111441	0.0186688	0.0148969	0.018863	0.0385709	0.0148969	0.0148969	0.0148969
FU165	0.00736778	0.0110797	0.0186688	0.00737303	0.00733609	0.00737303	0	0.00739975	0.00365881	0.00736778	0.0110797	0.0186688	0.00740504	1.3026	0.0791239	0.00365881	0.00737303	0.0437286	0.0187378	0.0148104	0.082306	0	0	0.0478358	0.0110797	0.0950668	0.00736778	0.0434852	0.0652361	0.0346763	0.0111441	0.0226441	0.00367713	0.00737303	0.0346231	0.0433131	0.0390231	0.00365881	0.00733609	0	0.00365881	0	0.00733609	0.0110318	0.0148969	0.0265061	0.00365881	0.0110318	0.00365881
FU169	0.00736778	0.0110797	0.0186688	0.00737303	0.00733609	0.00737303	0	0.00739975	0.00365881	0.00736778	0.0110797	0.0186688	0.00740504	1.3026	0.0791239	0.00365881	0.00737303	0.0437286	0.0187378	0.0148104	0.082306	0	0	0.0478358	0.0110797	0.0950668	0.00736778	0.0434852	0.0652361	0.0346763	0.0111441	0.0226441	0.00367713	0.00737303	0.0346231	0.0433131	0.0390231	0.00365881	0.00733609	0	0.00365881	0	0.00733609	0.0110318	0.0148969	0.0265061	0.00365881	0.0110318	0.00365881
FU176	0.0148104	0.0185597	0.0262694	0.0148211	0.014746	0.0148211	0.00733609	0.0148753	0.0110318	0.0148104	0.0185597	0.0262694	0.0148861	1.3156	0.0879455	0.0110318	0.0148211	0.0519649	0.0263676	0.0223276	0.0910269	0.00733609	0.00733609	0.0561158	0.0185597	0.0950668	0.0148104	0.0516721	0.0737982	0.0426051	0.0186688	0.030348	0.0110877	0.0148211	0.0425388	0.0514655	0.0470787	0.0110318	0.00733609	0.00733609	0.0110318	0.00733609	0.014746	0.0184786	0.0224596	0.0265061	0.0110318	0.0110318	0.00365881
FU178	0.0186415	0.0224266	0.0225598	0.0186551	0.0110797	0.0186551	0.0110797	0.0110797	0.0148104	0.0186415	0.0224266	0.0225598	0.0187378	1.3026	0.0839598	0.0148104	0.0186551	0.0563912	0.030348	0.0186415	0.0959187	0.0110797	0.0110797	0.060586	0.0224266	0.10023	0.0186415	0.0560699	0.0698577	0.0388107	0.0225598	0.0343856	0.0148861	0.0186551	0.0467457	0.0558432	0.0513828	0.0148104	0.00367453	0.0110797	0.00736778	0.0110797	0.0185597	0.0148104	0.0187516	0.0305091	0.0148104	0.00736778	0.00736778
FU180	0.0148104	0.0185597	0.0186688	0.0148211	0.00733609	0.0148211	0.00733609	0.0148753	0.0110318	0.0148104	0.0185597	0.0186688	0.0148861	1.29603	0.0791239	0.0110318	0.0148211	0.0519649	0.0263676	0.0148104	0.0910269	0.00733609	0.00733609	0.0561158	0.0185597	0.104321	0.0148104	0.0516721	0.0652361	0.0307421	0.0186688	0.030348	0.0110877	0.0148211	0.0425388	0.0514655	0.0470787	0.0110318	0.00733609	0.00733609	0.00365881	0.00733609	0.014746	0.0110318	0.0148969	0.034255	0.0110318	0.0110318	0.0110318
PD5	0.518949	0.527113	0.527396	0.490389	0.496938	0.490389	0.496938	0.524894	0.505059	0.518949	0.527113	0.527396	0.509578	2.30976	0.668312	0.505059	0.490389	0.62834	0.531889	0.483433	0.619566	0.496938	0.496938	0.606258	0.527113	0.559733	0.518949	0.55035	0.583679	0.568165	0.527396	0.542675	0.495816	0.490389	0.570837	0.517826	0.583679	0.505059	0.480631	0.496938	0.488794	0.496938	0.513156	0.480631	0.496938	0.489305	0.505059	0.488794	0.488794
PD11	0.0148861	0.0186551	0.0187654	0.014746	0.00737303	0.014746	0.0148211	0.0225431	0.0110877	0.0148861	0.0186551	0.0187654	0.0225598	1.33058	0.0796051	0.0110877	0.014746	0.0606363	0.034255	0.0148861	0.0784444	0.0148211	0.0148211	0.0564377	0.0186551	0.104998	0.0148861	0.0519649	0.0656198	0.034864	0.0187654	0.0305091	0.0186688	0.0148969	0.0427714	0.0430744	0.0388107	0.0110877	0.0148211	0.0148211	0.0110877	0.0148211	0.0148211	0.0110877	0.0149736	0.0423089	0.0110877	0.0110877	0.0185732
PD19	0.824873	0.816358	0.84161	0.864134	0.824873	0.864134	0.83329	0.872984	0.824873	0.824873	0.816358	0.84161	0.875911	1.65957	1.12938	0.824873	0.864134	0.800332	0.886291	0.813749	0.910457	0.83329	0.83329	0.904461	0.816358	1.09774	0.824873	0.917889	0.999658	0.881153	0.824873	0.839045	0.85587	0.847507	0.882655	0.997578	0.867628	0.824873	0.824873	0.83329	0.83329	0.83329	0.83329	0.84161	0.789403	0.927697	0.824873	0.816358	0.824873
PD21	0.0148753	0.0186415	0.0187516	0.0148861	0.00736778	0.0148861	0.00736778	0.00736778	0.0110797	0.0148753	0.0186415	0.0187516	0.0149517	1.31891	0.079535	0.0110797	0.0148861	0.0522185	0.0264863	0.0148753	0.0915002	0.00736778	0.00736778	0.0563912	0.0186415	0.104899	0.0148753	0.0519227	0.0655642	0.034837	0.0187516	0.030486	0.0111361	0.0148861	0.042738	0.0517139	0.0473031	0.0110797	0.00736778	0.00736778	0.00367453	0.00736778	0.0148104	0.0110797	0.0149626	0.0344118	0.0110797	0.0110797	0.0110797
PD22	0.0110797	0.0148104	0.00741034	0.0185732	0.00365881	0.0185732	0.0110318	0.0186415	0.00733609	0.0110797	0.0148104	0.00741034	0.0186551	1.3026	0.0660648	0.00733609	0.0185732	0.0561158	0.0302112	0.00367453	0.082306	0.0110318	0.0110318	0.0478358	0.0148104	0.0996815	0.0110797	0.0475679	0.0609886	0.0229346	0.0148969	0.0264863	0.0110877	0.0110877	0.0385709	0.0473787	0.0430405	0.00733609	0.0110318	0.0110318	0.00733609	0.0110318	0.0110318	0.00733609	0.0111441	0.0303708	0.00733609	0.00733609	0.014746
PD26	0.0111281	0.0148753	0.0225598	0.0111361	0.0110797	0.0111361	0.00367453	0.00367453	0.00736778	0.0111281	0.0148753	0.0225598	0.0111849	1.32541	0.0839598	0.00736778	0.0111361	0.0480679	0.0226441	0.0186415	0.0871036	0.00367453	0.00367453	0.0522185	0.0148753	0.10023	0.0111281	0.0477973	0.0698577	0.0388107	0.0149626	0.0266061	0.00740504	0.0111361	0.0387505	0.0476061	0.0432445	0.00736778	0.0110797	0.00367453	0.00736778	0.00367453	0.0110797	0.0148104	0.0187516	0.0305091	0.00736778	0.0148104	0.00736778
PD33	0	0.00365881	0.0187516	0.0148861	0.00736778	0.0148861	0.00736778	0.0149409	0.00367453	0.00739975	0.00365881	0.0187516	0.0149517	1.30913	0.079535	0.00367453	0.0148861	0.0522185	0.0264863	0.0148753	0.0733018	0.00736778	0.00736778	0.0394551	0.00365881	0.0955865	0.00739975	0.0352182	0.0655642	0.034837	0.011193	0.0149517	0.0111361	0.00740504	0.0266662	0.0435198	0.039207	0.00367453	0.0148104	0.00736778	0.0110797	0.00736778	0.00736778	0.0185597	0.0149626	0.0344118	0.00367453	0.0110797	0.0110797
PD6	0.115517	0.120319	0.116406	0.125271	0.105398	0.125271	0.114865	0.125871	0.110119	0.115517	0.120319	0.116406	0.120201	1.6786	0.185803	0.110119	0.125271	0.149915	0.135806	0.11074	0.18323	0.114865	0.114865	0.136608	0.120319	0.178121	0.115517	0.144624	0.191232	0.139815	0.110119	0.137422	0.109401	0.115629	0.124899	0.115629	0.149915	0.110119	0.105398	0.114865	0.110119	0.114865	0.114865	0.105398	0.116406	0.125871	0.110119	0.100704	0.110119
PD20	0.0742377	0.0785806	0.0747477	0.0734265	0.069565	0.0734265	0.0738614	0.0833762	0.069565	0.0742377	0.0785806	0.0747477	0.0834496	1.51866	0.139667	0.069565	0.0734265	0.131524	0.0972853	0.0699174	0.153303	0.0738614	0.0738614	0.115949	0.0785806	0.167223	0.0742377	0.120891	0.137564	0.0947274	0.069565	0.088329	0.0743017	0.0743017	0.0977164	0.0992316	0.0834496	0.069565	0.0781799	0.0738614	0.0738614	0.0738614	0.0738614	0.069565	0.069565	0.0833762	0.069565	0.0738614	0.0781799
PD24	0.15537	0.160572	0.167223	0.155539	0.154412	0.155539	0.144164	0.156342	0.149275	0.15537	0.160572	0.167223	0.151292	1.6354	0.224713	0.149275	0.155539	0.202778	0.167037	0.160572	0.237622	0.144164	0.144164	0.195716	0.160572	0.2359	0.15537	0.190308	0.238782	0.180611	0.16194	0.179986	0.144012	0.155539	0.156685	0.162789	0.19755	0.149275	0.154412	0.144164	0.149275	0.144164	0.154412	0.149275	0.167223	0.155708	0.149275	0.159575	0.149275
[truncated: 100 more columns]

## Sheet: Caption
Table. Estimates of Evolutionary Divergence between Sequences
The number of base substitutions per site from between sequences are shown. Standard error estimate(s) are shown above the diagonal. Analyses were conducted using the Maximum Composite Likelihood model [1]. The analysis involved 149 nucleotide sequences. Codon positions included were 1st+2nd+3rd+Noncoding. All positions containing gaps and missing data were eliminated. There were a total of 274 p…
1. Tamura K., Nei M., and Kumar S. (2004). Prospects for inferring very large phylogenies by using the neighbor-joining method. Proceedings of the National Academy of Sciences (USA) 101:11030-11035.
2. Tamura K., Peterson D., Peterson N., Stecher G., Nei M., and Kumar S. (2011). MEGA5: Molecular Evolutionary Genetics Analysis using Maximum Likelihood, Evolutionary Distance, and Maximum Parsimony Methods. Molecular Biology and Evolution (In Press).
Disclaimer: Although utmost care has been taken to ensure the correctness of the caption, the caption text is provided "as is" without any warranty of any kind. Authors advise the user to carefully check the caption prior to its use for any purpose and report any errors or problems to the authors immediately (www.megasoftware.net). In no event shall the authors and their employers be liable for a…
