# Supplementary figures and images for: Bartonella, Rickettsia, Babesia, and Hepatozoon Species in Fleas (Siphonaptera) Infesting Small Mammals of Slovakia (Central Europe)
Source: MDPI journal article supplement (doi:10.3390/pathogens11080886), 2022-08-06

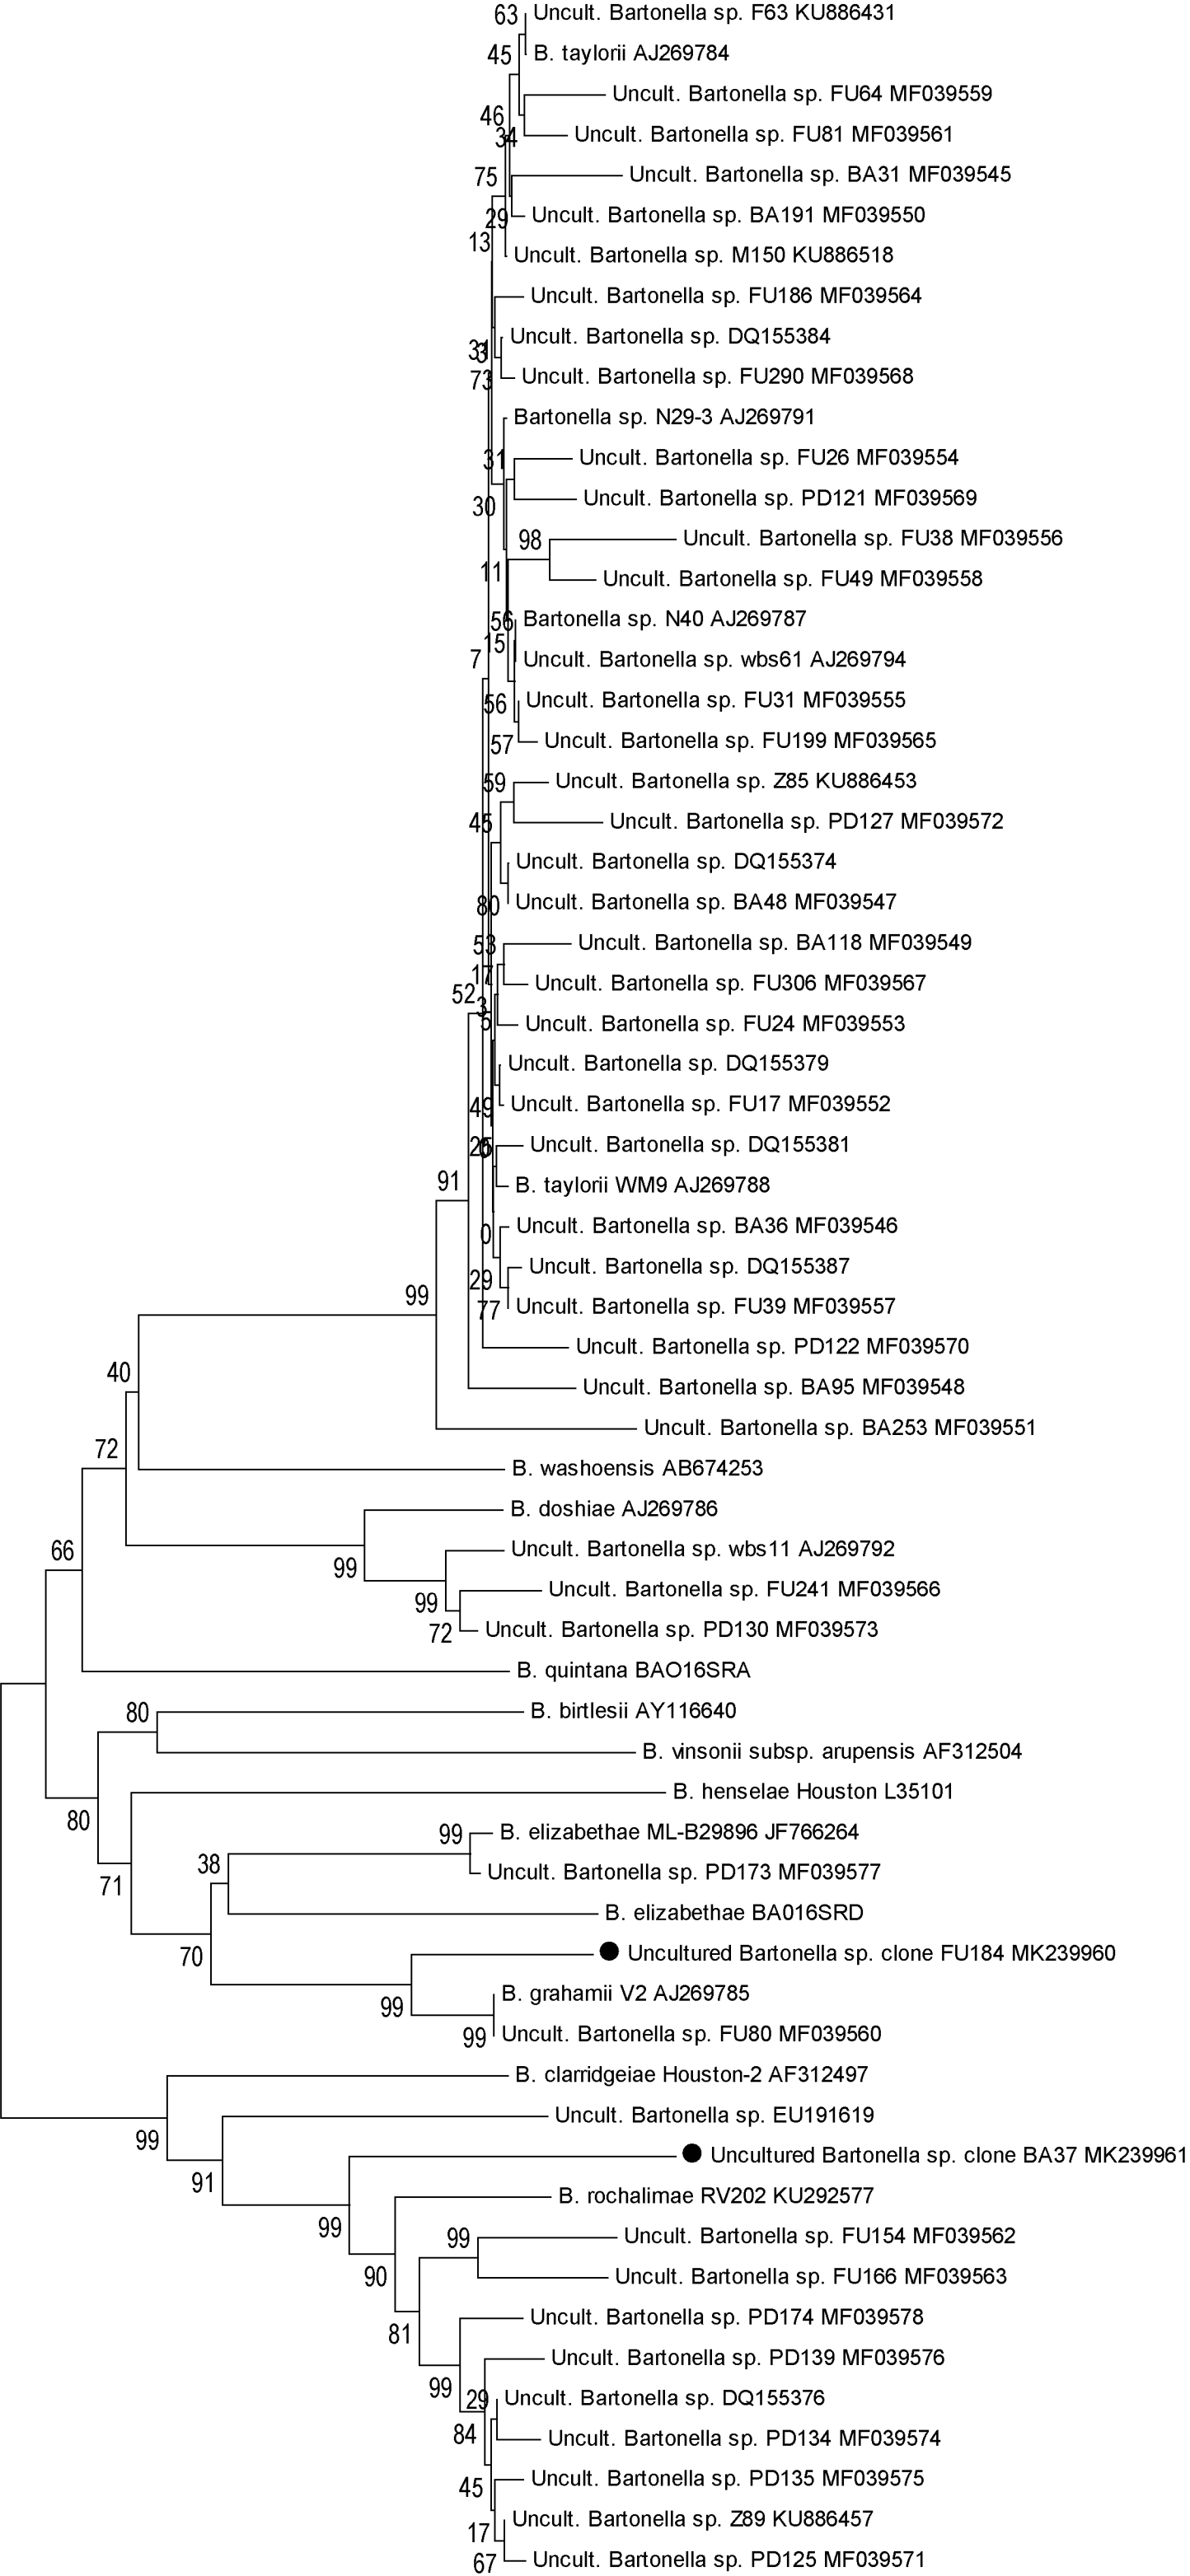

0.05

99 Uncult. Bartonella sp. FU80 MF039560

Supplement: s1 [file s1]

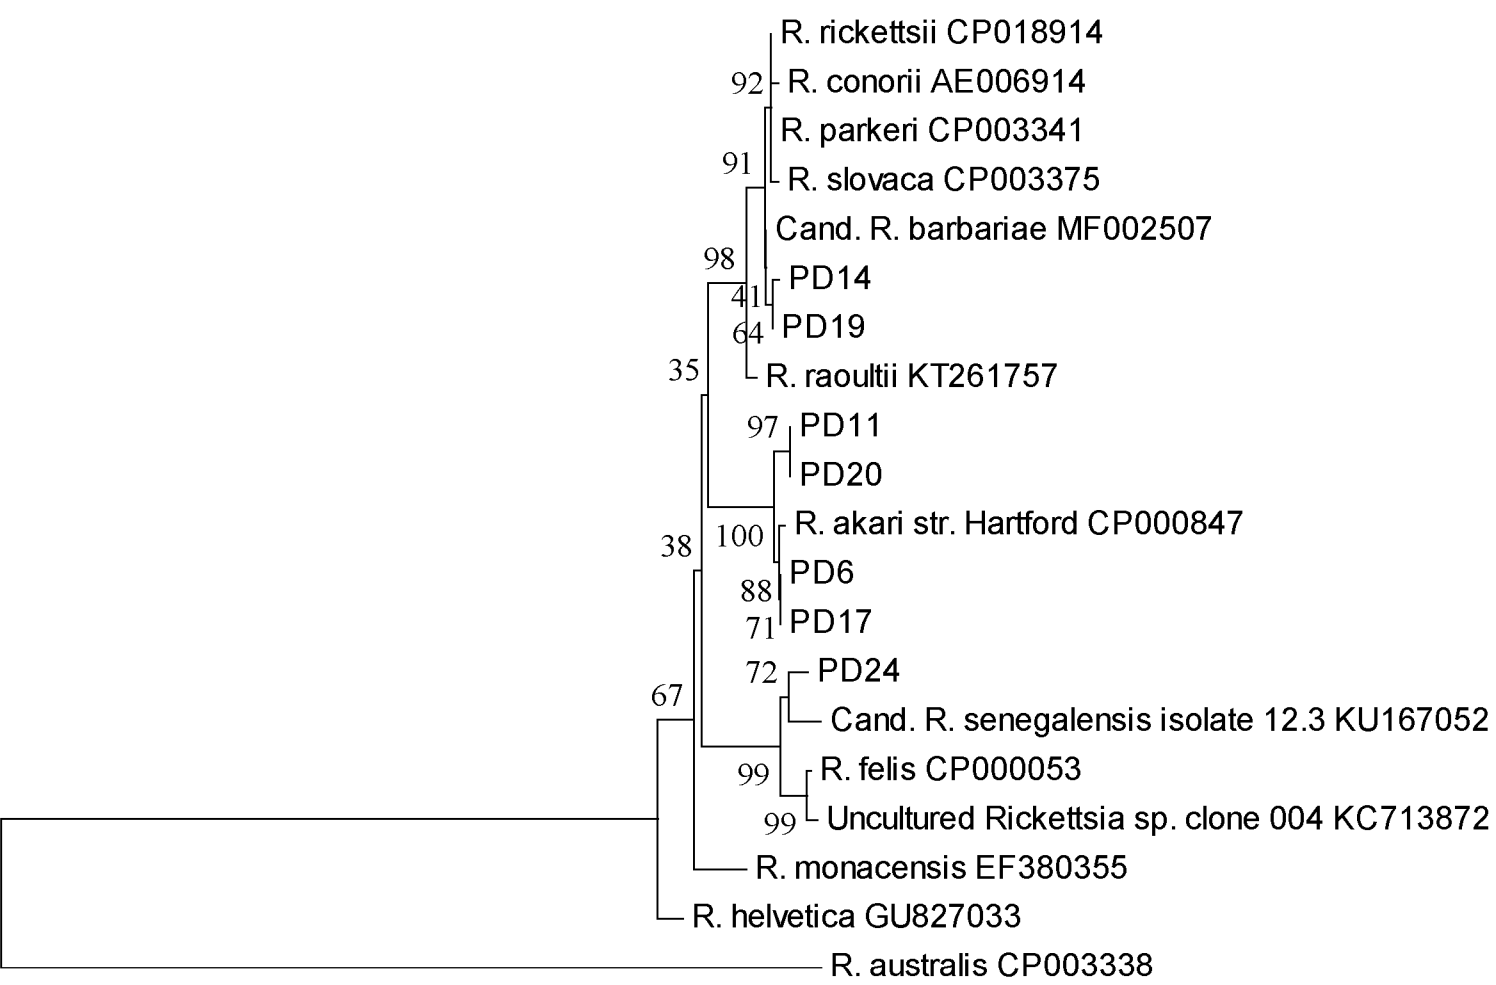

0.05

Supplement: s1 [file s1]

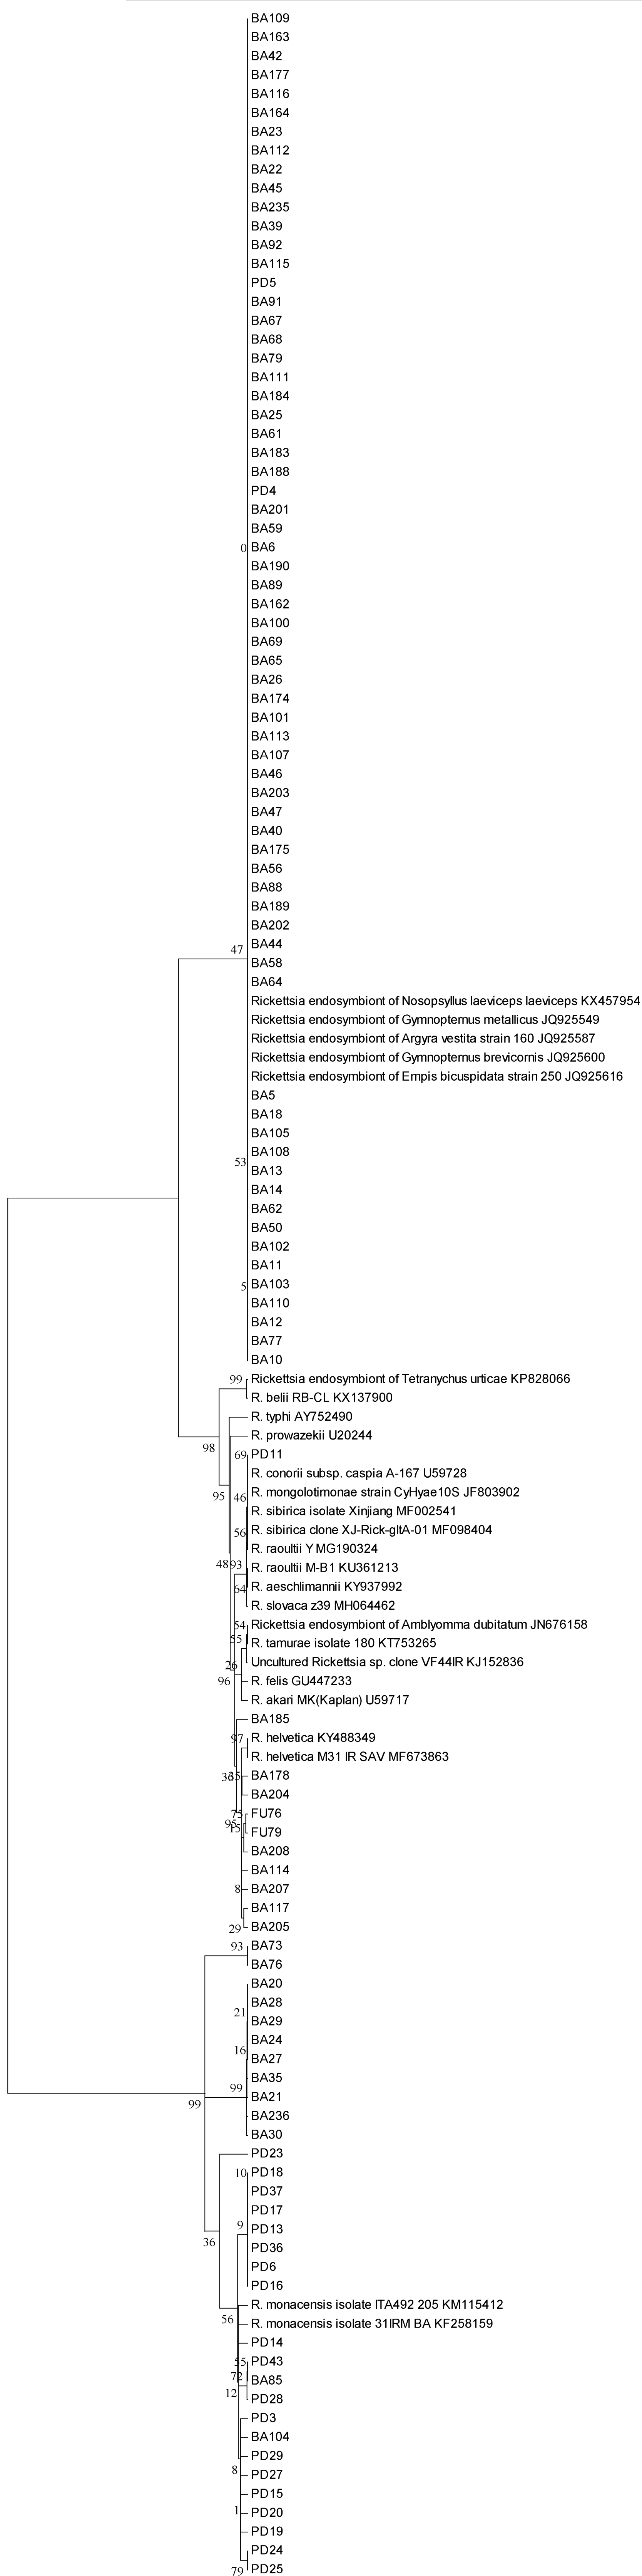

Supplement: s1 [file s1]
